# Supplementary material
Source: PubMed Central journal article supplement (PMC2676012)
Supplement: M809627200_1.pdf [file M809627200_1.pdf]

# **INTERDOMAIN FLEXIBILITY IN FULL-LENGTH MATRIX METALLOPROTEINASE-1 (MMP-1)\***

**Ivano Bertini,<sup>\*,1,2</sup> Marco Fragai,<sup>1,3</sup> Claudio Luchinat,<sup>1,3</sup> Maxime Melikian,<sup>1</sup> Efstratios Mylonas,<sup>4</sup>  
Niko Sarti,<sup>1,2</sup> Dmitri I. Svergun<sup>4,5</sup>**

<sup>1</sup> Magnetic Resonance Center (CERM) – University of Florence, Via L. Sacconi 6, 50019 Sesto Fiorentino, Italy.

<sup>2</sup> Department of Chemistry – University of Florence, Via della Lastruccia 3, 50019 Sesto Fiorentino, Italy.

<sup>3</sup> Department of Agricultural Biotechnology, University of Florence, Via Maragliano, 75-77, 50144 Florence, Italy.

<sup>4</sup> European Molecular Biology Laboratory, Hamburg Outstation, Notkestrasse 85, 22603 Hamburg, Germany.

<sup>5</sup> Institute of Crystallography, Russian Academy of Sciences, Leninsky pr. 59, 117333 Moscow, Russia

\*Address correspondence to: Ivano Bertini, via L. Sacconi 6, 50019 Sesto Fiorentino, Italy, Tel.: +390554574272. Fax: +390554574271. E-mail: [ivanobertini@cerm.unifi.it](mailto:ivanobertini@cerm.unifi.it)

## **Supplemental Data**

# INDEX

|                      |           |
|----------------------|-----------|
| <b>Table S1.....</b> | <b>3</b>  |
| <b>Table S2.....</b> | <b>9</b>  |
| <b>Table S3.....</b> | <b>12</b> |
| <b>Table S4.....</b> | <b>15</b> |
| <b>Table S5.....</b> | <b>21</b> |

**Table S1.** Backbone assigned resonances for the FL-MMP1-NNGH adduct (pH 7.2, 306K).

**Chemical shifts (ppm)**

| <b>Residue</b> | <b>H</b> | <b>N</b> | <b>CA</b> | <b>CB</b> |
|----------------|----------|----------|-----------|-----------|
| MET            | 105      |          |           |           |
| ASN            | 106      |          |           |           |
| PRO            | 107      |          | 60.20     |           |
| ARG            | 108      | 114.42   | 50.98     | 29.09     |
| TRP            | 109      | 122.56   | 54.24     | 26.88     |
| GLU            | 110      | 124.43   | 54.56     | 26.55     |
| GLN            | 111      | 118.65   | 51.34     | 26.74     |
| THR            | 112      | 106.73   | 58.56     | 66.14     |
| HIS            | 113      | 120.50   | 50.95     | 26.35     |
| LEU            | 114      | 127.53   | 50.34     | 41.94     |
| THR            | 115      | 111.46   | 55.33     | 69.73     |
| TYR            | 116      | 117.64   | 52.23     | 39.84     |
| ARG            | 117      | 119.57   | 52.00     | 30.89     |
| ILE            | 118      | 128.61   | 58.18     | 33.52     |
| GLU            | 119      | 129.03   | 56.44     | 27.87     |
| ASN            | 120      | 115.04   | 48.93     | 36.04     |
| TYR            | 121      | 115.23   | 55.56     | 36.76     |
| THR            | 122      |          | 55.60     | 66.70     |
| PRO            | 123      |          | 59.95     | 27.88     |
| ASP            | 124      | 122.03   | 52.94     | 38.11     |
| LEU            | 125      | 116.93   | 48.39     | 43.76     |
| PRO            | 126      |          | 59.44     | 27.64     |
| ARG            | 127      | 126.06   | 57.19     | 26.20     |
| ALA            | 128      | 117.59   | 51.90     | 14.89     |
| ASP            | 129      | 116.98   | 54.27     | 38.22     |
| VAL            | 130      | 124.06   | 63.59     | 27.90     |
| ASP            | 131      | 118.67   | 55.14     | 36.99     |
| HIS            | 132      | 118.69   | 56.43     | 26.85     |
| ALA            | 133      | 120.96   | 52.15     | 18.40     |
| ILE            | 134      | 116.46   | 59.63     | 32.76     |
| GLU            | 135      | 121.93   | 57.32     | 29.60     |
| LYS            | 136      | 117.28   | 55.21     | 31.60     |
| ALA            | 137      | 123.08   | 52.44     | 14.47     |
| PHE            | 138      | 115.08   | 60.42     | 35.35     |
| GLN            | 139      | 118.36   | 55.29     | 24.98     |
| LEU            | 140      | 117.68   | 54.63     | 41.70     |
| TRP            | 141      | 115.83   | 55.25     | 27.28     |
| SER            | 142      | 116.63   | 58.06     | 63.20     |
| ASN            | 143      | 116.63   | 52.17     | 35.93     |
| VAL            | 144      | 105.22   | 57.27     | 28.85     |
| THR            | 145      | 111.05   | 56.98     | 69.01     |
| PRO            | 146      |          | 59.47     | 28.08     |
| LEU            | 147      | 117.28   | 51.93     | 39.85     |
| THR            | 148      | 113.82   | 57.11     | 68.65     |
| PHE            | 149      | 118.88   | 53.07     | 38.42     |
| THR            | 150      | 120.53   | 58.74     | 68.39     |
| LYS            | 151      | 129.81   | 52.57     | 29.56     |
| VAL            | 152      | 122.96   | 56.68     | 30.22     |
| SER            | 153      | 116.66   | 56.02     | 60.74     |
| GLU            | 154      | 118.44   | 51.81     | 29.32     |
| GLY            | 155      | 108.18   | 41.67     |           |
| GLN            | 156      | 119.02   | 52.42     | 25.95     |
| ALA            | 157      | 126.61   | 46.75     | 18.96     |
| ASP            | 158      | 121.39   | 55.43     | 33.50     |
| ILE            | 159      | 124.96   | 58.38     | 35.60     |
| MET            | 160      | 126.74   | 50.08     | 27.91     |
| ILE            | 161      | 127.21   | 57.44     | 36.92     |
| SER            | 162      | 118.32   | 53.94     | 62.80     |
| PHE            | 163      | 122.67   | 54.01     | 37.06     |
| VAL            | 164      | 117.25   | 55.99     | 33.30     |

|     |     |       |        |       |       |
|-----|-----|-------|--------|-------|-------|
| ARG | 165 | 8.54  | 118.01 | 51.19 | 30.50 |
| GLY | 166 | 9.32  | 107.92 | 43.72 |       |
| ASP | 167 | 8.40  | 123.24 | 52.04 | 37.00 |
| HIS | 168 | 9.30  | 124.91 | 51.05 | 23.56 |
| ARG | 169 | 8.13  | 112.24 | 55.08 | 23.05 |
| ASP | 170 | 7.15  | 116.28 | 49.31 | 37.45 |
| ASN | 171 | 7.73  | 113.60 | 51.03 | 34.75 |
| SER | 172 | 7.61  | 115.36 | 51.51 | 60.47 |
| PRO | 173 |       |        | 60.11 | 28.14 |
| PHE | 174 | 8.24  | 120.56 | 55.69 | 36.35 |
| ASP | 175 | 8.48  | 116.02 | 50.55 | 38.25 |
| GLY | 176 | 8.80  | 110.84 | 41.29 |       |
| PRO | 177 |       |        | 60.82 | 27.98 |
| GLY | 178 | 11.53 | 119.88 | 40.18 |       |
| GLY | 179 | 8.50  | 110.88 | 43.41 |       |
| ASN | 180 | 10.86 | 127.07 | 51.89 | 35.86 |
| LEU | 181 | 8.40  | 123.43 | 52.71 | 44.38 |
| ALA | 182 | 7.44  | 113.80 | 48.46 | 19.21 |
| HIS | 183 | 8.93  | 115.03 | 50.97 | 27.70 |
| ALA | 184 | 8.51  | 122.88 | 47.43 | 21.09 |
| PHE | 185 | 8.12  | 120.45 | 54.19 | 38.15 |
| GLN | 186 | 8.20  | 118.52 | 51.43 | 23.45 |
| PRO | 187 |       |        | 61.18 | 31.60 |
| GLY | 188 | 5.64  | 107.72 | 41.07 |       |
| PRO | 189 |       |        | 59.52 | 32.80 |
| GLY | 190 | 8.89  | 111.41 | 44.19 |       |
| ILE | 191 | 8.98  | 135.02 | 58.82 | 37.83 |
| GLY | 192 | 7.63  | 106.70 | 43.71 |       |
| GLY | 193 | 7.60  | 119.16 | 43.63 |       |
| ASP | 194 | 8.36  | 123.18 | 52.96 | 36.71 |
| ALA | 195 | 8.40  | 119.08 | 47.93 | 18.25 |
| HIS | 196 | 8.94  | 120.97 | 48.04 | 30.41 |
| PHE | 197 | 8.78  | 122.20 | 53.61 | 37.96 |
| ASP | 198 | 7.88  | 122.51 | 51.31 | 36.42 |
| GLU | 199 | 9.84  | 131.25 | 53.31 | 27.46 |
| HIS | 200 | 8.87  | 118.88 | 53.56 | 35.74 |
| GLU | 201 | 7.33  | 115.79 | 50.18 | 23.90 |
| ARG | 202 | 7.82  | 126.38 | 51.66 | 25.29 |
| TRP | 203 | 9.16  | 130.32 | 52.94 | 27.69 |
| THR | 204 | 9.20  | 112.29 | 56.86 | 71.30 |
| ASN | 205 | 8.31  | 117.60 | 48.24 | 35.38 |
| ASN | 206 | 7.87  | 119.13 | 49.45 | 35.02 |
| PHE | 207 | 7.38  | 113.20 | 55.01 | 35.20 |
| ARG | 208 | 7.85  | 124.10 | 52.88 | 26.54 |
| GLU | 209 | 8.44  | 121.22 | 49.48 | 24.17 |
| TYR | 210 | 8.19  | 124.45 | 59.09 | 37.75 |
| ASN | 211 | 8.51  | 124.17 | 52.18 | 36.78 |
| LEU | 212 | 8.91  | 129.94 | 54.96 | 37.75 |
| HIS | 213 | 8.81  | 119.69 | 57.13 | 25.30 |
| ARG | 214 | 8.83  | 117.84 | 56.05 | 26.03 |
| VAL | 215 | 7.76  | 117.38 | 63.01 | 28.33 |
| ALA | 216 | 9.79  | 122.85 | 52.11 | 14.26 |
| ALA | 217 | 8.36  | 118.58 | 53.52 | 15.01 |
| HIS | 218 | 7.11  | 115.19 | 55.54 | 26.01 |
| ALA | 219 | 9.00  | 121.47 | 52.94 | 13.86 |
| LEU | 220 | 8.67  | 114.03 | 53.15 | 36.82 |
| GLY | 221 | 7.36  | 107.07 | 44.78 |       |
| HIS | 222 | 7.12  | 120.68 | 55.18 | 24.58 |
| SER | 223 | 7.95  | 118.38 | 59.94 |       |
| LEU | 224 | 7.17  | 114.51 | 51.81 | 38.93 |
| GLY | 225 | 8.22  | 108.38 | 41.43 |       |
| LEU | 226 | 8.14  | 120.41 | 52.12 | 38.27 |
| SER | 227 | 8.28  | 117.16 | 53.35 | 61.57 |
| HIS | 228 | 8.31  | 117.44 | 53.08 | 25.86 |
| SER | 229 | 6.87  | 114.77 | 52.31 | 61.81 |
| THR | 230 | 8.52  | 114.92 | 59.01 | 65.97 |
| ASP | 231 | 8.85  | 126.15 | 50.56 | 38.10 |
| ILE | 232 | 7.77  | 124.29 | 59.72 | 34.46 |
| GLY | 233 | 8.51  | 108.99 | 41.66 |       |
| ALA | 234 | 8.05  | 124.40 | 48.56 | 15.43 |

|     |     |       |        |       |       |
|-----|-----|-------|--------|-------|-------|
| LEU | 235 | 12.28 | 132.15 | 54.74 | 37.94 |
| MET | 236 | 8.35  | 112.84 | 50.40 | 23.73 |
| TYR | 237 | 8.08  | 128.64 | 54.11 | 35.40 |
| PRO | 238 |       |        | 59.75 | 26.80 |
| SER | 239 | 8.09  | 116.38 | 54.56 | 61.77 |
| TYR | 240 | 9.18  | 124.76 | 58.56 | 38.40 |
| THR | 241 | 7.12  | 119.75 | 58.07 | 68.18 |
| PHE | 242 |       |        | 58.00 | 38.40 |
| SER | 243 |       |        | 56.70 | 64.28 |
| GLY | 244 | 6.14  | 108.91 | 42.41 |       |
| ASP | 245 | 7.78  | 120.64 | 50.59 | 42.20 |
| VAL | 246 | 8.54  | 123.79 | 59.82 | 27.92 |
| GLN | 247 | 8.15  | 124.65 | 50.54 | 28.45 |
| LEU | 248 | 8.46  | 120.16 | 52.12 | 38.12 |
| ALA | 249 | 9.83  | 126.27 | 47.17 | 17.30 |
| GLN | 250 | 9.00  | 123.49 | 56.17 | 24.15 |
| ASP | 251 | 8.65  | 115.30 | 55.44 | 40.64 |
| ASP | 252 | 7.02  | 115.29 | 54.44 | 40.92 |
| ILE | 253 | 7.81  | 119.99 | 62.75 | 35.05 |
| ASP | 254 | 9.12  | 119.57 | 54.30 | 36.81 |
| GLY | 255 | 8.09  | 107.51 | 44.30 |       |
| ILE | 256 | 8.56  | 122.39 | 58.30 | 35.17 |
| GLN | 257 | 8.78  | 124.31 | 58.49 | 23.74 |
| ALA | 258 | 7.81  | 118.95 | 51.50 | 14.53 |
| ILE | 259 | 6.95  | 114.65 | 60.81 | 36.31 |
| TYR | 260 | 7.72  | 113.67 | 56.95 | 37.15 |
| GLY | 261 | 8.28  | 109.35 | 40.98 |       |
| ARG | 262 | 7.86  | 114.47 | 52.32 | 28.35 |
| SER | 263 | 7.48  | 114.43 | 55.17 | 60.43 |
| GLN | 264 |       |        |       |       |
| ASN | 265 |       |        |       |       |
| PRO | 266 |       |        | 60.50 |       |
| VAL | 267 | 8.00  | 120.28 | 59.07 |       |
| GLN | 268 | 8.24  | 125.32 | 50.31 | 25.76 |
| PRO | 269 |       |        | 60.02 |       |
| ILE | 270 | 8.06  | 120.44 | 57.77 | 35.78 |
| GLY | 271 | 8.24  | 112.73 | 41.42 |       |
| PRO | 272 |       |        |       |       |
| GLN | 273 |       |        |       |       |
| THR | 274 |       |        |       |       |
| PRO | 275 |       |        | 59.70 | 28.90 |
| LYS | 276 | 7.99  | 120.28 | 51.73 |       |
| ALA | 277 | 8.08  | 124.45 | 51.64 | 14.59 |
| CYS | 278 | 7.81  | 108.47 | 50.86 | 35.88 |
| ASP | 279 | 7.48  | 122.64 | 51.26 | 39.16 |
| SER | 280 |       |        |       |       |
| LYS | 281 | 8.48  | 121.07 | 52.58 |       |
| LEU | 282 | 7.16  | 123.75 | 53.73 | 39.15 |
| THR | 283 | 6.71  | 112.63 | 55.96 | 67.98 |
| PHE | 284 | 9.16  | 114.64 | 54.81 | 39.13 |
| ASP | 285 | 9.12  | 121.96 | 52.87 |       |
| ALA | 286 | 7.78  | 119.20 | 48.91 | 17.39 |
| ILE | 287 | 8.71  | 122.01 | 57.77 | 41.70 |
| THR | 288 | 8.55  | 117.06 | 57.28 | 66.42 |
| THR | 289 | 6.96  | 115.27 | 58.32 | 67.02 |
| ILE | 290 | 8.48  | 118.44 | 58.39 | 36.10 |
| ARG | 291 | 10.34 | 130.93 | 54.19 | 25.13 |
| GLY | 292 | 9.25  | 106.61 | 42.52 |       |
| GLU | 293 | 7.84  | 120.26 | 51.83 |       |
| VAL | 294 | 8.30  | 120.98 | 59.70 | 28.40 |
| MET | 295 | 8.48  | 126.36 | 51.43 | 32.35 |
| PHE | 296 | 8.93  | 123.51 | 52.82 |       |
| PHE | 297 | 8.81  | 118.32 | 55.07 | 38.21 |
| LYS | 298 | 9.16  | 124.21 | 52.80 | 31.59 |
| ASP | 299 | 10.15 | 129.21 | 54.25 | 36.69 |
| ARG | 300 | 7.38  | 121.87 | 53.32 | 27.44 |
| PHE | 301 | 8.99  | 121.40 | 55.30 | 39.37 |
| TYR | 302 | 8.95  | 116.29 | 52.32 | 39.17 |
| MET | 303 | 9.06  | 118.27 | 50.96 | 33.51 |
| ARG | 304 | 9.14  | 123.38 | 51.80 | 31.27 |

|     |     |       |        |       |       |
|-----|-----|-------|--------|-------|-------|
| THR | 305 | 9.05  | 118.63 | 57.63 | 67.28 |
| ASN | 306 | 8.91  | 124.01 | 47.88 | 38.00 |
| PRO | 307 |       |        | 61.22 |       |
| PHE | 308 | 8.42  | 116.66 | 55.21 | 36.04 |
| TYR | 309 | 7.90  | 119.82 | 51.97 |       |
| PRO | 310 |       |        | 61.08 |       |
| GLU | 311 | 7.81  | 119.79 | 53.50 | 27.75 |
| VAL | 312 | 8.38  | 124.10 | 58.81 | 29.39 |
| GLU | 313 | 8.38  | 129.17 | 52.33 | 28.16 |
| LEU | 314 | 8.10  | 129.61 | 50.67 | 41.15 |
| ASN | 315 | 7.83  | 122.61 | 48.05 | 38.70 |
| PHE | 316 | 8.97  | 119.16 | 54.75 | 36.30 |
| ILE | 317 | 8.91  | 125.73 | 64.07 | 36.16 |
| SER | 318 | 8.57  | 111.41 | 57.07 | 59.84 |
| VAL | 319 | 7.41  | 120.02 | 61.69 | 28.16 |
| PHE | 320 | 7.16  | 121.08 | 56.19 | 36.81 |
| TRP | 321 | 8.12  | 114.57 | 52.03 | 25.84 |
| PRO | 322 |       |        | 61.71 |       |
| GLN | 323 | 8.20  | 113.67 | 53.48 | 25.37 |
| LEU | 324 | 7.27  | 120.64 | 49.04 | 38.49 |
| PRO | 325 |       |        | 58.80 | 28.27 |
| ASN | 326 | 7.41  | 110.71 | 48.92 | 36.63 |
| GLY | 327 | 7.80  | 109.41 | 45.05 |       |
| LEU | 328 | 8.34  | 121.41 | 52.03 | 38.93 |
| GLU | 329 | 8.56  | 116.86 | 53.93 |       |
| ALA | 330 | 7.76  | 117.15 | 48.71 | 18.67 |
| ALA | 331 | 8.86  | 123.83 | 48.64 | 19.75 |
| TYR | 332 | 8.95  | 115.49 | 54.31 | 37.32 |
| GLU | 333 | 7.80  | 122.05 | 51.01 | 29.20 |
| PHE | 334 | 9.32  | 128.93 | 50.97 | 34.80 |
| ALA | 335 | 9.26  | 130.69 | 52.87 | 14.78 |
| ASP | 336 | 7.97  | 116.72 | 53.70 | 37.32 |
| ARG | 337 | 6.28  | 113.15 | 51.21 | 28.03 |
| ASP | 338 | 7.97  | 120.80 | 51.68 | 36.74 |
| GLU | 339 | 7.05  | 114.62 | 51.32 | 32.25 |
| VAL | 340 | 8.71  | 124.07 | 57.58 | 29.77 |
| ARG | 341 | 8.76  | 126.00 | 51.40 | 29.32 |
| PHE | 342 | 8.68  | 119.55 | 53.46 | 40.06 |
| PHE | 343 | 8.80  | 119.81 | 54.82 |       |
| LYS | 344 | 8.74  | 121.94 | 55.27 | 32.20 |
| GLY | 345 | 10.32 | 122.44 | 44.05 |       |
| ASN | 346 | 8.05  | 121.50 | 48.52 | 33.55 |
| LYS | 347 | 7.87  | 119.25 | 51.38 | 33.73 |
| TYR | 348 | 8.48  | 116.08 | 52.05 | 38.34 |
| TRP | 349 | 9.10  | 120.74 | 55.19 | 31.80 |
| ALA | 350 |       |        | 46.56 |       |
| VAL | 351 | 9.03  | 117.93 | 56.08 | 31.35 |
| GLN | 352 | 8.41  | 123.63 | 52.05 | 28.68 |
| GLY | 353 | 9.41  | 118.26 | 44.05 |       |
| GLN | 354 | 8.88  | 125.01 | 53.64 |       |
| ASN | 355 | 8.04  | 117.74 | 50.14 | 37.28 |
| VAL | 356 | 8.59  | 125.21 | 59.73 | 28.10 |
| LEU | 357 | 8.20  | 129.93 | 52.78 | 38.25 |
| HIS | 358 | 8.41  | 120.26 | 55.07 | 26.97 |
| GLY | 359 |       |        | 41.80 |       |
| TYR | 360 | 7.28  | 117.40 | 54.05 | 34.58 |
| PRO | 361 |       |        |       |       |
| LYS | 362 |       |        | 51.43 |       |
| ASP | 363 | 8.13  | 117.80 | 50.30 | 40.46 |
| ILE | 364 | 8.00  | 112.96 | 61.59 | 33.90 |
| TYR | 365 | 7.59  | 125.29 | 57.52 | 33.14 |
| SER | 366 | 9.54  | 116.75 | 57.81 | 59.46 |
| SER | 367 |       |        | 58.01 |       |
| PHE | 368 | 7.03  | 114.74 | 55.18 |       |
| GLY | 369 | 7.48  | 103.52 | 42.68 |       |
| PHE | 370 | 6.37  | 115.81 | 54.88 | 35.33 |
| PRO | 371 |       |        |       |       |
| ARG | 372 | 8.55  | 118.21 | 54.98 | 24.83 |
| THR | 373 | 6.97  | 105.69 | 59.28 | 65.40 |
| VAL | 374 | 7.74  | 124.24 | 60.57 | 27.81 |

|     |     |      |        |       |       |
|-----|-----|------|--------|-------|-------|
| LYS | 375 |      |        |       |       |
| HIS | 376 | 7.21 | 112.80 | 51.42 | 28.14 |
| ILE | 377 | 9.94 | 122.91 | 55.96 |       |
| ASP | 378 | 8.49 | 122.89 | 53.92 |       |
| ALA | 379 | 7.95 | 118.45 | 49.12 | 18.91 |
| ALA | 380 | 8.88 | 124.15 | 48.68 |       |
| LEU | 381 | 8.07 | 116.11 | 52.05 |       |
| SER | 382 | 8.65 | 118.46 | 53.83 |       |
| GLU | 383 | 9.16 | 130.82 | 53.10 | 28.12 |
| GLU | 384 | 8.21 | 129.36 | 55.82 |       |
| ASN | 385 | 9.07 | 115.94 | 52.94 |       |
| THR | 386 | 7.80 | 108.26 | 59.08 | 68.21 |
| GLY | 387 | 8.36 | 110.59 | 43.30 |       |
| LYS | 388 | 7.69 | 115.88 | 49.89 | 29.62 |
| THR | 389 | 9.30 | 122.61 | 57.31 | 67.11 |
| TYR | 390 | 8.94 | 125.97 | 53.19 |       |
| PHE | 391 | 8.68 | 119.33 | 53.43 |       |
| PHE | 392 |      |        | 55.55 |       |
| VAL | 393 | 9.48 | 125.73 | 59.24 | 31.41 |
| ALA | 394 | 8.41 | 119.21 | 51.22 |       |
| ASN | 395 | 8.31 | 116.70 | 50.60 | 35.25 |
| LYS | 396 |      |        |       |       |
| TYR | 397 |      |        |       |       |
| TRP | 398 |      |        |       |       |
| ARG | 399 |      |        | 51.06 | 30.95 |
| TYR | 400 | 9.55 | 130.33 | 54.00 | 39.81 |
| ASP | 401 | 7.71 | 127.38 | 49.94 | 40.08 |
| GLU | 402 | 8.83 | 123.59 | 54.56 |       |
| TYR | 403 | 8.04 | 117.47 | 56.55 |       |
| LYS | 404 | 8.77 | 120.63 | 53.96 |       |
| ARG | 405 | 7.91 | 116.32 | 53.58 | 22.65 |
| SER | 406 | 6.93 | 110.21 | 53.82 | 62.40 |
| MET | 407 | 8.94 | 125.68 | 52.87 |       |
| ASP | 408 | 9.07 | 115.69 | 53.28 |       |
| PRO | 409 |      |        | 60.92 | 28.16 |
| GLY | 410 | 8.12 | 109.43 | 42.32 |       |
| TYR | 411 | 7.49 | 117.96 | 54.36 |       |
| PRO | 412 |      |        |       |       |
| LYS | 413 |      |        |       |       |
| MET | 414 | 8.66 | 117.78 | 51.97 |       |
| ILE | 415 | 8.53 | 126.03 | 63.64 |       |
| ALA | 416 | 9.02 | 117.60 | 50.81 | 15.02 |
| HIS | 417 | 6.88 | 112.43 | 54.19 | 27.80 |
| ASP | 418 | 6.79 | 115.90 | 51.89 | 39.32 |
| PHE | 419 |      |        |       |       |
| PRO | 420 |      |        |       |       |
| GLY | 421 |      |        | 42.31 |       |
| ILE | 422 | 6.96 | 114.76 | 57.14 | 33.15 |
| GLY | 423 | 7.31 | 108.17 | 41.26 |       |
| HIS | 424 | 7.77 | 115.48 | 52.56 | 28.36 |
| LYS | 425 | 7.29 | 118.18 | 52.20 | 31.42 |
| VAL | 426 | 9.79 | 125.63 | 58.62 |       |
| ASP | 427 | 9.15 | 124.86 | 52.76 | 37.47 |
| ALA | 428 | 7.96 | 119.86 | 48.48 | 19.36 |
| VAL | 429 | 8.44 | 119.28 | 56.39 | 30.97 |
| PHE | 430 | 7.83 | 118.63 | 53.61 |       |
| MET | 431 | 8.76 | 121.11 | 50.94 |       |
| LYS | 432 | 8.81 | 125.06 | 54.19 | 32.82 |
| ASP | 433 |      |        | 52.82 |       |
| GLY | 434 | 8.53 | 102.50 | 42.05 |       |
| PHE | 435 | 7.80 | 117.44 | 54.07 | 37.75 |
| PHE | 436 | 8.80 | 119.49 | 50.92 | 36.10 |
| TYR | 437 | 8.69 | 122.81 | 54.51 | 35.16 |
| PHE | 438 | 8.72 | 120.60 | 54.70 | 39.85 |
| PHE | 439 | 8.96 | 119.50 | 53.94 |       |
| HIS | 440 | 9.16 | 123.21 | 52.93 | 28.34 |
| GLY | 441 | 9.79 | 120.89 | 44.12 |       |
| THR | 442 | 8.41 | 116.44 | 59.15 | 65.77 |
| ARG | 443 | 8.21 | 123.39 | 53.07 | 28.81 |
| GLN | 444 | 8.05 | 121.30 | 49.49 |       |

|     |     |      |        |       |       |
|-----|-----|------|--------|-------|-------|
| TYR | 445 | 9.64 | 126.67 | 52.96 | 37.78 |
| LYS | 446 | 8.26 | 125.38 | 52.57 | 30.09 |
| PHE | 447 | 9.80 | 131.86 | 53.93 | 40.33 |
| ASP | 448 | 8.37 | 128.18 | 47.17 | 39.81 |
| PRO | 449 |      |        | 60.59 |       |
| LYS | 450 | 8.00 | 118.03 | 55.91 | 28.14 |
| THR | 451 | 6.84 | 106.06 | 58.33 | 67.08 |
| LYS | 452 | 7.92 | 118.84 | 54.17 | 25.49 |
| ARG | 453 | 6.53 | 114.87 | 51.18 | 30.22 |
| ILE | 454 | 8.39 | 121.50 | 58.08 | 34.94 |
| LEU | 455 | 9.19 | 128.57 | 53.03 | 39.70 |
| THR | 456 | 7.15 | 109.40 | 57.80 | 68.47 |
| LEU | 457 | 8.11 | 126.66 | 51.37 | 39.88 |
| GLN | 458 | 9.04 | 124.12 | 50.66 | 29.74 |
| LYS | 459 | 8.53 | 120.62 | 52.97 | 29.57 |
| ALA | 460 | 8.34 | 124.96 | 52.06 | 14.32 |
| ASN | 461 | 7.63 | 112.21 | 49.52 | 34.75 |
| SER | 462 | 7.37 | 115.26 | 59.21 |       |
| TRP | 463 | 7.93 | 121.87 | 55.67 | 24.26 |
| PHE | 464 | 7.24 | 116.79 | 51.19 | 34.59 |
| ASN | 465 | 8.09 | 117.23 | 50.97 | 33.99 |
| CYS | 466 | 8.34 | 119.41 | 53.02 | 38.60 |
| ARG | 467 |      |        |       |       |
| LYS | 468 | 8.35 | 123.38 | 53.30 | 29.33 |
| ASN | 469 | 7.93 | 125.68 | 51.77 | 37.10 |



**Table S2.** Backbone assigned resonances for the CAT-MMP1-NNGH adduct (pH 7.2, 306K).

**Chemical shifts (ppm)**

| Residue |     | H    | N      | CA    | CB    |
|---------|-----|------|--------|-------|-------|
| MET     | 105 |      |        |       |       |
| ASN     | 106 |      |        |       |       |
| PRO     | 107 |      |        | 62.95 | 32.20 |
| ARG     | 108 | 7.81 | 112.17 | 53.76 | 32.60 |
| TRP     | 109 | 8.09 | 120.11 | 57.01 | 29.90 |
| GLU     | 110 | 9.27 | 122.20 | 57.05 | 29.70 |
| GLN     | 111 | 8.48 | 116.58 | 54.15 | 29.80 |
| THR     | 112 | 8.05 | 104.93 | 61.45 | 68.90 |
| HIS     | 113 | 7.36 | 118.31 | 53.83 | 29.43 |
| LEU     | 114 | 8.33 | 125.07 | 53.10 | 45.50 |
| THR     | 115 | 9.31 | 109.33 | 58.00 | 72.70 |
| TYR     | 116 | 8.65 | 115.46 | 54.90 | 43.10 |
| ARG     | 117 | 8.45 | 117.26 | 54.70 | 34.30 |
| ILE     | 118 | 9.24 | 126.44 | 60.93 | 37.00 |
| GLU     | 119 | 9.80 | 126.80 | 59.30 | 31.30 |
| ASN     | 120 | 7.86 | 112.63 | 51.58 | 39.10 |
| TYR     | 121 | 8.51 | 112.81 | 58.26 | 40.70 |
| THR     | 122 |      |        | 55.60 | 66.70 |
| PRO     | 123 |      |        | 62.60 | 31.30 |
| ASP     | 124 | 9.01 | 119.77 | 55.72 | 41.27 |
| LEU     | 125 | 7.13 | 114.60 | 51.05 | 47.30 |
| PRO     | 126 |      |        | 62.22 | 32.10 |
| ARG     | 127 | 8.71 | 123.80 | 60.00 | 29.60 |
| ALA     | 128 | 8.80 | 115.26 | 54.70 | 18.20 |
| ASP     | 129 | 7.41 | 114.67 | 57.00 | 41.00 |
| VAL     | 130 | 7.75 | 121.74 | 66.45 | 31.10 |
| ASP     | 131 | 8.66 | 116.40 | 57.88 | 40.00 |
| HIS     | 132 | 8.34 | 116.43 | 59.19 | 30.46 |
| ALA     | 133 | 8.12 | 118.67 | 55.01 | 18.40 |
| ILE     | 134 | 8.01 | 114.01 | 62.41 | 36.00 |
| GLU     | 135 | 8.90 | 119.75 | 60.21 | 29.60 |
| LYS     | 136 | 8.70 | 115.04 | 57.98 | 31.60 |
| ALA     | 137 | 7.64 | 120.90 | 55.29 | 17.80 |
| PHE     | 138 | 7.92 | 112.84 | 63.30 | 38.60 |
| GLN     | 139 | 8.23 | 116.38 | 58.19 | 28.20 |
| LEU     | 140 | 7.44 | 115.55 | 57.33 | 41.70 |
| TRP     | 141 | 6.86 | 113.51 | 58.11 | 30.40 |
| SER     | 142 | 9.33 | 115.29 | 61.10 | 63.20 |
| ASN     | 143 | 8.08 | 114.30 | 54.87 | 38.90 |
| VAL     | 144 | 7.22 | 103.82 | 60.00 | 32.40 |
| THR     | 145 | 7.62 | 109.01 | 59.50 | 71.90 |
| PRO     | 146 |      |        | 62.12 | 31.50 |
| LEU     | 147 | 7.12 | 115.67 | 54.39 | 43.40 |
| THR     | 148 | 8.26 | 111.53 | 59.92 | 71.70 |
| PHE     | 149 | 8.39 | 117.05 | 55.70 | 41.70 |
| THR     | 150 | 8.68 | 118.49 | 61.51 | 71.18 |
| LYS     | 151 | 8.47 | 127.60 | 55.40 | 33.10 |
| VAL     | 152 | 8.81 | 120.42 | 59.35 | 33.90 |
| SER     | 153 | 8.86 | 114.12 | 58.75 | 64.00 |
| GLU     | 154 | 7.59 | 116.02 | 54.52 | 32.60 |
| GLY     | 155 | 8.59 | 105.78 | 44.40 |       |
| GLN     | 156 | 8.35 | 116.59 | 55.20 | 29.10 |
| ALA     | 157 | 7.78 | 124.60 | 49.49 | 22.10 |
| ASP     | 158 | 8.15 | 119.09 | 58.26 | 41.26 |
| ILE     | 159 | 8.90 | 122.48 | 61.15 | 39.30 |
| MET     | 160 | 7.62 | 124.52 | 52.80 | 31.70 |
| ILE     | 161 | 9.34 | 125.12 | 60.10 | 40.30 |
| SER     | 162 | 8.74 | 116.02 | 56.64 | 66.10 |
| PHE     | 163 | 9.12 | 120.21 | 56.69 | 40.40 |
| VAL     | 164 | 9.02 | 114.83 | 58.65 | 36.70 |

|     |     |       |        |       |       |
|-----|-----|-------|--------|-------|-------|
| ARG | 165 | 8.67  | 115.58 | 53.90 | 33.90 |
| GLY | 166 | 9.42  | 105.58 | 46.57 |       |
| ASP | 167 | 9.17  | 125.88 | 54.80 | 40.10 |
| HIS | 168 | 9.42  | 122.57 | 53.68 | 26.50 |
| ARG | 169 | 8.24  | 109.70 | 57.87 | 26.10 |
| ASP | 170 | 7.26  | 113.94 | 52.00 | 40.40 |
| ASN | 171 | 7.54  | 110.53 | 53.57 | 37.70 |
| SER | 172 | 7.71  | 112.97 | 54.30 | 63.60 |
| PRO | 173 |       |        | 62.85 | 31.50 |
| PHE | 174 | 8.34  | 118.28 | 58.44 | 39.50 |
| ASP | 175 | 8.59  | 113.73 | 53.30 | 41.16 |
| GLY | 176 | 8.92  | 108.44 | 44.00 |       |
| PRO | 177 |       |        | 63.50 | 31.20 |
| GLY | 178 | 11.67 | 117.59 | 43.00 |       |
| GLY | 179 | 8.64  | 108.51 | 46.15 |       |
| ASN | 180 | 10.98 | 124.72 | 54.64 | 38.92 |
| LEU | 181 | 8.53  | 121.19 | 55.40 | 44.38 |
| ALA | 182 | 7.56  | 111.52 | 51.18 | 22.68 |
| HIS | 183 | 9.04  | 112.61 | 53.78 | 30.50 |
| ALA | 184 | 8.62  | 120.53 | 50.18 | 24.31 |
| PHE | 185 | 8.19  | 118.07 | 56.90 | 41.10 |
| GLN | 186 | 8.34  | 116.32 | 54.19 | 26.60 |
| PRO | 187 |       |        | 64.40 | 31.60 |
| GLY | 188 | 5.79  | 105.59 | 43.90 |       |
| PRO | 189 |       |        | 62.20 | 32.80 |
| GLY | 190 | 9.04  | 109.04 | 46.94 |       |
| ILE | 191 | 9.13  | 132.69 | 61.50 | 37.83 |
| GLY | 192 | 7.74  | 104.38 | 46.50 |       |
| GLY | 193 | 7.69  | 116.73 | 46.47 |       |
| ASP | 194 | 8.44  | 120.86 | 55.70 | 39.80 |
| ALA | 195 | 8.50  | 116.84 | 50.70 | 21.70 |
| HIS | 196 | 9.04  | 118.66 | 50.75 | 33.50 |
| PHE | 197 | 8.88  | 119.90 | 56.40 | 41.62 |
| ASP | 198 | 8.00  | 120.24 | 53.80 | 39.90 |
| GLU | 199 | 9.99  | 128.90 | 56.10 | 30.90 |
| HIS | 200 | 8.96  | 116.45 | 56.24 | 38.90 |
| GLU | 201 | 7.43  | 113.42 | 52.90 | 27.20 |
| ARG | 202 | 7.93  | 124.05 | 54.41 | 28.90 |
| TRP | 203 | 9.30  | 128.15 | 55.69 | 30.80 |
| THR | 204 | 9.31  | 109.91 | 59.54 | 71.30 |
| ASN | 205 | 8.44  | 115.17 | 50.90 | 38.70 |
| ASN | 206 | 7.96  | 116.89 | 52.14 | 38.00 |
| PHE | 207 | 7.54  | 110.72 | 57.88 | 38.50 |
| ARG | 208 | 7.99  | 121.79 | 55.68 | 29.70 |
| GLU | 209 | 8.59  | 119.04 | 52.30 | 27.40 |
| TYR | 210 | 8.30  | 122.34 | 61.99 | 41.85 |
| ASN | 211 | 8.64  | 121.87 | 54.91 | 39.73 |
| LEU | 212 | 9.02  | 127.62 | 57.75 | 41.55 |
| HIS | 213 | 8.93  | 117.32 | 59.99 | 28.27 |
| ARG | 214 | 8.93  | 115.43 | 58.89 | 29.46 |
| VAL | 215 | 7.84  | 114.88 | 65.89 | 31.66 |
| ALA | 216 | 9.91  | 120.53 | 54.93 | 17.50 |
| ALA | 217 | 8.49  | 116.40 | 56.44 | 18.39 |
| HIS | 218 | 7.26  | 113.18 | 58.42 | 28.88 |
| ALA | 219 | 9.13  | 119.30 | 55.76 | 17.55 |
| LEU | 220 | 8.76  | 111.62 | 55.90 | 40.10 |
| GLY | 221 | 7.47  | 104.75 | 47.64 |       |
| HIS | 222 | 7.20  | 118.30 | 57.89 | 27.57 |
| SER | 223 | 8.01  | 115.99 | 62.63 |       |
| LEU | 224 | 7.27  | 112.17 | 54.70 | 42.30 |
| GLY | 225 | 8.28  | 105.54 | 44.14 |       |
| LEU | 226 | 8.21  | 118.12 | 55.05 | 42.10 |
| SER | 227 | 8.40  | 114.85 | 56.15 | 64.74 |
| HIS | 228 | 8.44  | 114.87 | 55.88 | 29.20 |
| SER | 229 | 6.97  | 112.33 | 55.02 | 65.02 |
| THR | 230 | 8.65  | 112.49 | 61.70 | 68.80 |
| ASP | 231 | 9.00  | 123.85 | 53.38 | 41.10 |
| ILE | 232 | 7.90  | 122.08 | 62.50 | 38.14 |
| GLY | 233 | 8.66  | 107.50 | 44.38 |       |
| ALA | 234 | 8.13  | 122.09 | 51.35 | 19.07 |

|     |     |       |        |       |       |
|-----|-----|-------|--------|-------|-------|
| LEU | 235 | 12.30 | 129.87 | 57.53 | 41.30 |
| MET | 236 | 8.50  | 110.43 | 53.05 | 26.90 |
| TYR | 237 | 8.17  | 126.31 | 56.79 | 38.70 |
| PRO | 238 |       |        | 62.37 | 26.80 |
| SER | 239 | 8.24  | 114.27 | 57.28 | 64.40 |
| TYR | 240 | 9.30  | 124.81 | 60.64 | 38.40 |
| THR | 241 | 7.26  | 117.41 | 60.92 | 71.70 |
| PHE | 242 |       |        | 58.00 | 38.40 |
| SER | 243 |       |        | 56.70 | 64.28 |
| GLY | 244 | 6.20  | 106.68 | 45.23 |       |
| ASP | 245 | 7.90  | 118.30 | 53.11 | 42.20 |
| VAL | 246 | 8.66  | 121.30 | 62.64 | 31.53 |
| GLN | 247 | 8.30  | 122.25 | 53.26 | 32.20 |
| LEU | 248 | 8.57  | 118.04 | 54.87 | 41.50 |
| ALA | 249 | 9.95  | 124.39 | 49.81 | 20.80 |
| GLN | 250 | 9.14  | 121.22 | 59.00 | 27.30 |
| ASP | 251 | 8.81  | 112.98 | 58.25 | 43.90 |
| ASP | 252 | 7.17  | 113.05 | 57.15 | 44.10 |
| ILE | 253 | 7.87  | 117.99 | 65.50 | 38.30 |
| ASP | 254 | 9.27  | 117.49 | 57.00 | 39.60 |
| GLY | 255 | 8.21  | 105.39 | 47.06 |       |
| ILE | 256 | 8.64  | 120.50 | 61.12 | 38.70 |
| GLN | 257 | 8.86  | 122.27 | 58.38 | 27.10 |
| ALA | 258 | 7.86  | 119.05 | 53.99 | 17.70 |
| ILE | 259 | 7.16  | 112.84 | 63.48 | 39.60 |
| TYR | 260 | 7.89  | 112.99 | 59.44 | 39.88 |
| GLY | 261 | 8.17  | 113.49 | 45.89 |       |

**Table S3.** Backbone assigned resonances for the MMP1 HPX domain (pH 7.2, 306K).

**Chemical shifts (ppm)**

| Residue |     | H     | N      | CA    | CB    |
|---------|-----|-------|--------|-------|-------|
| MET     | 274 |       |        |       |       |
| PRO     | 275 |       |        | 60.04 | 29.21 |
| LYS     | 276 | 7.96  | 120.79 | 52.23 | 30.79 |
| ALA     | 277 | 8.02  | 124.55 | 51.97 | 15.44 |
| CYS     | 278 | 7.71  | 109.45 | 51.38 | 36.61 |
| ASP     | 279 | 7.38  | 123.02 | 51.63 | 39.76 |
| SER     | 280 |       |        | 57.81 | 60.68 |
| LYS     | 281 | 8.43  | 121.54 | 52.90 | 28.76 |
| LEU     | 282 | 7.10  | 124.26 | 54.05 | 40.02 |
| THR     | 283 | 6.65  | 113.25 | 56.15 | 68.30 |
| PHE     | 284 | 9.11  | 115.03 | 55.08 | 39.81 |
| ASP     | 285 | 9.11  | 122.87 | 52.96 | 39.42 |
| ALA     | 286 | 7.73  | 120.00 | 49.20 | 18.05 |
| ILE     | 287 | 8.65  | 122.59 | 58.02 | 41.70 |
| THR     | 288 | 8.51  | 117.60 | 57.64 | 66.97 |
| THR     | 289 | 6.87  | 115.81 | 58.50 | 67.52 |
| ILE     | 290 | 8.42  | 118.94 | 58.67 | 36.49 |
| ARG     | 291 | 10.31 | 131.74 | 54.49 | 25.98 |
| GLY     | 292 | 9.22  | 107.11 | 42.81 |       |
| GLU     | 293 | 7.78  | 120.75 | 52.12 | 29.12 |
| VAL     | 294 | 8.25  | 121.47 | 60.04 | 29.17 |
| MET     | 295 | 8.44  | 127.00 | 51.71 | 33.34 |
| PHE     | 296 | 8.89  | 124.15 | 53.04 | 38.38 |
| PHE     | 297 | 8.74  | 118.80 | 55.24 | 38.21 |
| LYS     | 298 | 9.07  | 124.69 | 53.03 | 32.47 |
| ASP     | 299 | 10.07 | 129.78 | 54.45 | 37.45 |
| ARG     | 300 | 7.47  | 122.37 | 53.57 | 28.39 |
| PHE     | 301 | 8.98  | 122.59 | 55.47 | 39.91 |
| TYR     | 302 | 8.91  | 116.88 | 52.56 | 40.05 |
| MET     | 303 | 8.99  | 118.96 | 51.19 | 34.41 |
| ARG     | 304 | 9.05  | 124.17 | 52.01 | 31.83 |
| THR     | 305 | 8.96  | 119.22 | 57.83 | 67.73 |
| ASN     | 306 | 8.86  | 124.48 | 48.08 | 38.53 |
| PRO     | 307 |       |        | 61.50 | 29.23 |
| PHE     | 308 | 8.36  | 117.25 | 55.49 | 36.62 |
| TYR     | 309 | 7.86  | 120.33 | 52.21 |       |
| PRO     | 310 |       |        | 61.28 | 28.77 |
| GLU     | 311 | 7.76  | 120.35 | 53.84 | 28.16 |
| VAL     | 312 | 8.32  | 124.71 | 59.14 | 30.26 |
| GLU     | 313 | 8.28  | 129.74 | 52.54 | 28.65 |
| LEU     | 314 | 8.15  | 130.09 | 50.99 | 41.99 |
| ASN     | 315 | 7.85  | 123.85 | 48.23 | 39.36 |
| PHE     | 316 | 8.82  | 119.56 | 54.82 | 37.02 |
| ILE     | 317 | 8.87  | 126.43 | 64.51 | 36.88 |
| SER     | 318 | 8.52  | 111.85 | 57.40 | 60.40 |
| VAL     | 319 | 7.34  | 120.50 | 61.92 | 28.91 |
| PHE     | 320 | 7.10  | 121.99 | 56.70 | 37.68 |
| TRP     | 321 | 8.14  | 115.14 | 52.38 |       |
| PRO     | 322 |       |        | 61.97 | 29.22 |
| GLN     | 323 | 8.16  | 114.30 | 53.75 | 26.25 |
| LEU     | 324 | 7.25  | 121.30 | 49.19 | 38.49 |
| PRO     | 325 |       |        | 58.96 | 28.97 |
| ASN     | 326 | 7.36  | 111.21 | 49.11 | 37.03 |
| GLY     | 327 | 7.75  | 109.94 | 45.39 |       |
| LEU     | 328 | 8.26  | 121.96 | 52.26 | 40.02 |
| GLU     | 329 | 8.49  | 117.51 | 54.12 | 29.26 |
| ALA     | 330 | 7.71  | 117.68 | 48.97 | 19.31 |
| ALA     | 331 | 8.80  | 124.35 | 48.93 | 20.74 |
| TYR     | 332 | 8.90  | 116.10 | 54.52 | 37.67 |
| GLU     | 333 | 7.75  | 122.60 | 51.23 | 30.04 |

|     |     |       |        |       |       |
|-----|-----|-------|--------|-------|-------|
| PHE | 334 | 9.26  | 129.49 | 51.21 | 35.53 |
| ALA | 335 | 9.23  | 131.37 | 53.23 | 15.40 |
| ASP | 336 | 7.94  | 117.32 | 53.95 | 37.90 |
| ARG | 337 | 6.22  | 113.64 | 51.41 | 29.04 |
| ASP | 338 | 7.91  | 121.26 | 51.90 | 37.15 |
| GLU | 339 | 6.98  | 115.01 | 51.57 | 33.12 |
| VAL | 340 | 8.66  | 124.56 | 57.94 | 30.53 |
| ARG | 341 | 8.72  | 126.76 | 51.71 | 30.12 |
| PHE | 342 | 8.62  | 120.28 | 53.76 | 40.81 |
| PHE | 343 | 8.73  | 120.34 | 54.96 | 39.32 |
| LYS | 344 | 8.66  | 122.41 | 55.62 | 33.34 |
| GLY | 345 | 10.29 | 123.02 | 44.29 |       |
| ASN | 346 | 7.99  | 122.14 | 48.64 | 33.90 |
| LYS | 347 | 7.79  | 119.69 | 51.65 | 34.23 |
| TYR | 348 | 8.43  | 116.77 | 52.20 | 39.32 |
| TRP | 349 | 9.04  | 121.33 | 55.47 | 32.41 |
| ALA | 350 |       |        | 46.86 | 18.60 |
| VAL | 351 | 8.99  | 118.74 | 56.36 | 32.49 |
| GLN | 352 | 8.36  | 124.35 | 52.38 | 29.52 |
| GLY | 353 | 9.39  | 119.02 | 44.35 |       |
| GLN | 354 | 8.86  | 125.63 | 53.89 | 27.08 |
| ASN | 355 | 7.97  | 118.37 | 50.28 | 37.77 |
| VAL | 356 | 8.55  | 125.85 | 60.14 | 28.70 |
| LEU | 357 | 8.17  | 130.67 | 53.02 | 39.27 |
| HIS | 358 | 8.38  | 120.68 | 55.48 | 27.90 |
| GLY | 359 |       |        | 42.09 |       |
| TYR | 360 | 7.21  | 117.81 | 54.33 | 35.20 |
| PRO | 361 |       |        |       |       |
| LYS | 362 |       |        | 51.65 | 34.23 |
| ASP | 363 | 8.09  | 118.39 | 50.43 | 41.09 |
| ILE | 364 | 7.91  | 113.31 | 61.82 | 34.52 |
| TYR | 365 | 7.53  | 125.83 | 57.87 | 33.73 |
| SER | 366 | 9.48  | 117.48 | 57.81 | 59.92 |
| SER | 367 |       |        | 58.22 | 60.99 |
| PHE | 368 | 6.96  | 115.22 | 55.35 | 38.16 |
| GLY | 369 | 7.43  | 103.97 | 42.94 |       |
| PHE | 370 | 6.29  | 116.27 | 55.18 | 36.22 |
| PRO | 371 |       |        | 59.32 | 29.56 |
| ARG | 372 | 8.44  | 118.60 | 54.98 | 25.97 |
| THR | 373 | 6.91  | 106.08 | 59.52 | 65.88 |
| VAL | 374 | 7.70  | 124.78 | 60.92 | 28.67 |
| LYS | 375 |       |        | 53.27 | 30.94 |
| HIS | 376 | 7.16  | 113.31 | 51.76 | 28.94 |
| ILE | 377 | 9.93  | 123.72 | 56.21 | 38.52 |
| ASP | 378 | 8.42  | 123.63 | 53.92 | 39.06 |
| ALA | 379 | 7.90  | 119.09 | 49.33 | 20.01 |
| ALA | 380 | 8.82  | 124.97 | 48.92 | 21.27 |
| LEU | 381 | 8.02  | 116.80 | 52.31 | 42.58 |
| SER | 382 | 8.59  | 119.01 | 54.19 | 62.64 |
| GLU | 383 | 9.09  | 131.50 | 53.43 | 28.12 |
| GLU | 384 | 8.17  | 130.10 | 56.04 | 27.33 |
| ASN | 385 | 9.03  | 116.40 | 53.23 | 35.53 |
| THR | 386 | 7.73  | 108.65 | 59.31 | 68.56 |
| GLY | 387 | 8.35  | 111.23 | 43.59 |       |
| LYS | 388 | 7.63  | 116.33 | 50.14 | 30.76 |
| THR | 389 | 9.24  | 123.16 | 57.53 | 67.52 |
| TYR | 390 | 8.86  | 126.55 | 53.40 | 38.12 |
| PHE | 391 | 8.60  | 119.80 | 53.45 |       |
| PHE | 392 |       |        | 55.80 | 36.76 |
| VAL | 393 | 9.41  | 126.26 | 59.57 | 32.67 |
| ALA | 394 | 8.35  | 119.62 | 51.52 | 14.07 |
| ASN | 395 | 8.26  | 117.11 | 50.88 | 35.25 |
| LYS | 396 |       |        |       |       |
| TYR | 397 |       |        |       |       |
| TRP | 398 |       |        |       |       |
| ARG | 399 |       |        | 51.43 | 31.84 |
| TYR | 400 | 9.48  | 130.89 | 54.28 | 40.57 |
| ASP | 401 | 7.64  | 127.93 | 50.06 | 40.92 |
| GLU | 402 | 8.80  | 124.15 | 54.91 |       |
| TYR | 403 | 7.99  | 117.97 | 56.77 | 34.52 |

|     |     |      |        |       |       |
|-----|-----|------|--------|-------|-------|
| LYS | 404 | 8.71 | 121.23 | 54.28 | 30.06 |
| ARG | 405 | 7.85 | 116.86 | 53.84 | 23.51 |
| SER | 406 | 6.88 | 110.69 | 54.13 | 63.13 |
| MET | 407 | 8.91 | 126.19 | 52.87 | 35.40 |
| ASP | 408 | 9.03 | 115.59 | 53.69 |       |
| PRO | 409 |      |        | 61.22 | 28.90 |
| GLY | 410 | 8.09 | 109.94 | 42.63 |       |
| TYR | 411 | 7.44 | 118.52 | 54.53 |       |
| PRO | 412 |      |        |       |       |
| LYS | 413 |      |        | 51.71 | 34.15 |
| MET | 414 | 8.62 | 118.37 | 52.23 | 27.88 |
| ILE | 415 | 8.47 | 126.66 | 64.05 | 36.42 |
| ALA | 416 | 9.01 | 118.24 | 51.17 | 15.66 |
| HIS | 417 | 6.82 | 112.81 | 54.38 | 28.27 |
| ASP | 418 | 6.70 | 116.58 | 52.13 | 39.32 |
| PHE | 419 |      |        |       |       |
| PRO | 420 |      |        |       |       |
| GLY | 421 |      |        | 42.66 |       |
| ILE | 422 | 6.90 | 115.14 | 57.51 | 34.07 |
| GLY | 423 | 7.29 | 108.81 | 41.51 |       |
| HIS | 424 | 7.74 | 115.89 | 52.95 | 29.12 |
| LYS | 425 | 7.24 | 118.79 | 52.40 | 32.45 |
| VAL | 426 | 9.77 | 126.52 | 58.88 | 31.59 |
| ASP | 427 | 9.07 | 125.72 | 52.98 | 38.51 |
| ALA | 428 | 7.89 | 120.54 | 48.71 | 19.37 |
| VAL | 429 | 8.38 | 119.82 | 56.62 | 30.97 |
| PHE | 430 | 7.78 | 119.22 | 53.92 | 37.95 |
| MET | 431 | 8.70 | 121.56 | 51.11 | 32.93 |
| LYS | 432 | 8.75 | 125.60 | 54.51 | 33.79 |
| ASP | 433 |      |        | 53.03 | 37.43 |
| GLY | 434 | 8.50 | 102.94 | 42.34 |       |
| PHE | 435 | 7.74 | 117.95 | 54.36 | 38.70 |
| PHE | 436 | 8.74 | 120.04 | 51.08 | 36.92 |
| TYR | 437 | 8.62 | 123.30 | 54.72 | 35.82 |
| PHE | 438 | 8.65 | 121.19 | 54.99 | 40.58 |
| PHE | 439 | 8.88 | 120.06 | 54.12 | 38.12 |
| HIS | 440 | 9.08 | 123.52 | 53.45 | 28.97 |
| GLY | 441 | 9.73 | 121.75 | 44.41 |       |
| THR | 442 | 8.38 | 116.70 | 59.36 | 66.11 |
| ARG | 443 | 8.14 | 123.92 | 53.41 | 29.78 |
| GLN | 444 | 7.96 | 121.98 | 49.72 | 29.41 |
| TYR | 445 | 9.57 | 127.28 | 53.23 | 38.49 |
| LYS | 446 | 8.21 | 125.98 | 52.88 | 31.17 |
| PHE | 447 | 9.74 | 132.46 | 54.19 | 41.11 |
| ASP | 448 | 8.31 | 128.78 | 47.33 | 40.49 |
| PRO | 449 |      |        | 60.92 | 29.51 |
| LYS | 450 | 7.95 | 118.52 | 56.21 | 29.03 |
| THR | 451 | 6.76 | 106.47 | 58.55 | 67.32 |
| LYS | 452 | 7.86 | 119.17 | 54.42 | 26.45 |
| ARG | 453 | 6.47 | 115.29 | 51.39 | 31.15 |
| ILE | 454 | 8.36 | 122.10 | 58.51 | 35.89 |
| LEU | 455 | 9.13 | 129.26 | 53.35 | 40.50 |
| THR | 456 | 7.09 | 109.98 | 58.00 | 68.94 |
| LEU | 457 | 8.09 | 127.24 | 51.56 | 40.96 |
| GLN | 458 | 8.99 | 124.71 | 50.88 | 30.63 |
| LYS | 459 | 8.50 | 121.30 | 53.31 | 30.46 |
| ALA | 460 | 8.27 | 125.55 | 52.33 | 15.24 |
| ASN | 461 | 7.55 | 112.57 | 49.70 | 35.18 |
| SER | 462 | 7.30 | 115.91 | 59.78 | 60.28 |
| TRP | 463 | 7.87 | 122.48 | 55.81 | 24.77 |
| PHE | 464 | 7.18 | 117.24 | 51.35 | 35.41 |
| ASN | 465 | 8.01 | 117.52 | 51.06 | 34.41 |
| CYS | 466 | 8.33 | 119.78 | 53.31 | 38.60 |
| ARG | 467 |      |        | 53.43 | 28.09 |
| LYS | 468 | 8.27 | 123.99 | 53.56 | 30.32 |
| ASN | 469 | 7.89 | 126.33 | 51.96 | 37.63 |

**Table S4.**  $^{15}\text{N}$   $R_1$ ,  $R_2$ , NOE on the FL-MMP-1 and on the isolated CAT/HPX domains at 700 (pH 7.2, 306K).

| Residue | Number | $R_1$ ( $\text{s}^{-1}$ ) |       |        |       | $R_2$ ( $\text{s}^{-1}$ ) |       |        |       | NOE  |
|---------|--------|---------------------------|-------|--------|-------|---------------------------|-------|--------|-------|------|
|         |        | FL                        |       | Single |       | FL                        |       | Single |       | FL   |
|         |        | Exp.                      | Calc. | Exp.   | Calc. | Exp.                      | Calc. | Exp.   | Calc. | Exp. |
| GLY     | 105    |                           | 0,51  |        | 1,41  |                           | 33,78 |        | 11,83 |      |
| ASN     | 106    |                           | 0,50  |        | 1,40  |                           | 34,36 |        | 11,95 |      |
| PRO     | 107    |                           |       |        |       |                           |       |        |       |      |
| ARG     | 108    | 0,88                      | 0,43  | 1,44   | 1,40  | 17,85                     | 39,53 | 8,00   | 11,95 | 0,59 |
| TRP     | 109    | 0,77                      | 0,44  | 1,43   | 1,39  | 24,80                     | 39,06 | 10,30  | 11,99 | 0,89 |
| GLU     | 110    | 0,72                      | 0,50  | 1,33   | 1,39  | 22,50                     | 34,72 | 11,60  | 11,96 | 0,77 |
| GLN     | 111    | 0,84                      | 0,57  | 1,19   | 1,39  | 15,80                     | 30,77 |        | 11,99 | 0,48 |
| THR     | 112    | 0,76                      | 0,52  | 1,34   | 1,41  | 18,50                     | 33,22 | 11,30  | 11,85 | 0,70 |
| HIS     | 113    | 0,85                      | 0,47  | 1,48   | 1,39  | 22,80                     | 36,36 | 11,15  | 12,02 | 0,84 |
| LEU     | 114    | 0,81                      | 0,42  | 1,31   | 1,40  | 20,40                     | 40,65 | 9,95   | 11,92 | 0,76 |
| THR     | 115    | 0,85                      | 0,54  | 1,39   | 1,43  | 21,20                     | 32,26 | 10,20  | 11,68 | 0,78 |
| TYR     | 116    | 1,02                      | 0,58  | 1,67   | 1,44  | 24,60                     | 30,40 | 11,20  | 11,51 | 0,84 |
| ARG     | 117    | 0,73                      | 0,58  | 1,45   | 1,44  | 21,10                     | 30,40 | 11,40  | 11,52 | 0,77 |
| ILE     | 118    | 0,88                      | 0,58  | 1,46   | 1,44  | 22,20                     | 30,40 | 9,10   | 11,51 | 0,76 |
| GLU     | 119    | 0,85                      | 0,56  | 1,43   | 1,42  | 21,00                     | 31,35 | 10,10  | 11,75 | 0,82 |
| ASN     | 120    | 0,79                      | 0,53  | 1,35   | 1,42  | 19,65                     | 32,57 | 10,20  | 11,76 | 0,91 |
| TYR     | 121    | 0,73                      | 0,51  | 1,36   | 1,39  | 21,60                     | 34,13 | 9,60   | 12,02 | 0,95 |
| THR     | 122    |                           | 0,54  |        | 1,38  |                           | 32,15 |        | 12,05 |      |
| PRO     | 123    |                           |       |        |       |                           |       |        |       |      |
| ASP     | 124    | 0,86                      | 0,55  | 1,46   | 1,40  | 22,75                     | 31,65 | 11,95  | 11,86 | 0,78 |
| LEU     | 125    | 0,80                      | 0,45  | 1,37   | 1,40  | 24,90                     | 38,17 | 10,35  | 11,92 | 0,83 |
| PRO     | 126    |                           |       |        |       |                           |       |        |       |      |
| ARG     | 127    | 0,91                      | 0,53  | 1,44   | 1,39  | 22,55                     | 32,68 | 12,15  | 12,03 | 0,81 |
| ALA     | 128    | 0,91                      | 0,58  | 1,52   | 1,38  | 23,30                     | 30,49 | 11,20  | 12,12 | 0,71 |
| ASP     | 129    | 0,85                      | 0,57  | 1,29   | 1,37  | 25,00                     | 30,58 | 10,55  | 12,18 | 0,70 |
| VAL     | 130    | 0,88                      | 0,53  | 1,39   | 1,39  | 22,00                     | 32,68 | 11,00  | 11,98 | 0,82 |
| ASP     | 131    | 0,75                      | 0,56  | 1,36   | 1,39  | 29,60                     | 31,25 | 11,00  | 12,05 | 0,92 |
| HIS     | 132    | 0,83                      | 0,58  |        | 1,37  |                           | 30,40 |        | 12,20 | 0,72 |
| ALA     | 133    | 0,74                      | 0,56  | 1,36   | 1,37  | 25,10                     | 31,06 | 11,90  | 12,15 | 0,73 |
| ILE     | 134    | 0,70                      | 0,54  | 1,35   | 1,39  | 27,70                     | 32,05 | 14,50  | 12,03 | 0,67 |
| GLU     | 135    | 0,70                      | 0,57  | 1,29   | 1,38  |                           | 30,86 | 15,95  | 12,08 | 0,89 |
| LYS     | 136    | 0,96                      | 0,58  | 1,37   | 1,37  | 35,60                     | 30,40 | 11,70  | 12,21 | 0,67 |
| ALA     | 137    | 0,79                      | 0,52  | 1,33   | 1,39  | 24,60                     | 33,56 | 15,50  | 12,02 | 0,87 |
| PHE     | 138    | 0,73                      | 0,55  | 1,43   | 1,39  |                           | 31,45 | 11,10  | 11,98 | 0,96 |
| GLN     | 139    | 0,71                      | 0,58  | 1,36   | 1,37  | 28,20                     | 30,40 | 10,90  | 12,20 | 0,85 |
| LEU     | 140    | 0,77                      | 0,56  | 1,31   | 1,38  |                           | 31,25 | 11,50  | 12,11 | 0,80 |
| TRP     | 141    | 0,69                      | 0,53  | 1,34   | 1,38  | 26,00                     | 32,68 | 10,00  | 12,08 | 0,78 |
| SER     | 142    | 0,80                      | 0,58  | 1,37   | 1,37  | 25,40                     | 30,49 | 10,90  | 12,18 | 0,95 |
| ASN     | 143    | 0,74                      | 0,58  | 1,37   | 1,39  | 28,20                     | 30,40 | 10,50  | 12,03 | 0,63 |
| VAL     | 144    | 0,69                      | 0,52  | 1,30   | 1,40  | 24,80                     | 33,44 | 9,90   | 11,90 | 0,89 |
| THR     | 145    | 0,78                      | 0,57  | 1,39   | 1,40  | 24,35                     | 30,58 | 9,40   | 11,88 | 0,77 |
| PRO     | 146    |                           |       |        |       |                           |       |        |       |      |
| LEU     | 147    | 0,81                      | 0,51  | 1,35   | 1,42  | 23,60                     | 34,25 | 9,80   | 11,70 | 0,86 |
| THR     | 148    | 0,78                      | 0,46  | 1,40   | 1,40  | 23,70                     | 37,04 | 9,70   | 11,92 | 0,76 |
| PHE     | 149    | 0,83                      | 0,48  | 1,41   | 1,41  | 23,55                     | 35,97 | 10,35  | 11,78 | 0,67 |
| THR     | 150    |                           | 0,53  | 1,29   | 1,42  | 24,20                     | 32,79 | 10,55  | 11,74 | 0,96 |
| LYS     | 151    | 0,75                      | 0,51  | 1,36   | 1,43  | 20,90                     | 33,78 | 9,75   | 11,67 | 0,88 |
| VAL     | 152    | 0,76                      | 0,56  | 1,43   | 1,44  | 30,70                     | 30,96 | 10,70  | 11,56 | 0,60 |
| SER     | 153    | 0,90                      | 0,54  | 1,17   | 1,41  | 20,20                     | 32,36 | 13,10  | 11,86 | 0,69 |
| GLU     | 154    | 0,77                      | 0,58  | 1,40   | 1,42  | 20,90                     | 30,40 | 11,60  | 11,71 | 0,50 |
| GLY     | 155    | 0,82                      | 0,53  | 1,32   | 1,38  | 18,00                     | 32,47 | 11,15  | 12,08 | 0,55 |
| GLN     | 156    |                           | 0,43  |        | 1,39  |                           | 39,68 |        | 11,99 | 0,77 |
| ALA     | 157    | 0,71                      | 0,58  | 1,13   | 1,43  | 13,60                     | 30,40 | 7,00   | 11,66 | 0,14 |
| ASP     | 158    | 0,63                      | 0,57  | 1,42   | 1,44  | 22,90                     | 30,67 | 10,85  | 11,57 | 0,82 |
| ILE     | 159    | 0,85                      | 0,58  | 1,40   | 1,44  | 24,70                     | 30,49 | 10,90  | 11,53 | 0,81 |
| MET     | 160    | 0,76                      | 0,57  | 1,44   | 1,43  | 18,40                     | 30,67 | 10,00  | 11,66 | 0,79 |
| ILE     | 161    | 0,87                      | 0,57  | 1,43   | 1,44  | 16,70                     | 30,96 | 10,20  | 11,55 | 0,81 |
| SER     | 162    | 0,88                      | 0,51  | 1,40   | 1,42  | 24,00                     | 33,67 | 11,50  | 11,76 | 0,86 |
| PHE     | 163    | 0,75                      | 0,51  | 1,26   | 1,42  | 22,75                     | 34,13 | 10,50  | 11,75 | 0,84 |
| VAL     | 164    | 0,80                      | 0,47  | 1,41   | 1,40  | 24,40                     | 36,50 | 11,10  | 11,92 | 0,80 |

|     |     |      |      |      |      |       |       |       |       |      |
|-----|-----|------|------|------|------|-------|-------|-------|-------|------|
| ARG | 165 | 0,77 | 0,42 | 1,15 | 1,40 | 29,00 | 40,65 | 9,70  | 11,92 | 0,61 |
| GLY | 166 | 0,76 | 0,43 | 1,42 | 1,39 | 19,90 | 39,68 | 11,20 | 11,96 | 0,70 |
| ASP | 167 |      | 0,58 |      | 1,40 |       | 30,40 |       | 11,89 |      |
| HIS | 168 | 0,85 | 0,56 | 1,47 | 1,39 | 23,35 | 31,15 | 11,35 | 11,99 |      |
| ARG | 169 | 0,96 | 0,54 | 1,59 | 1,43 | 21,90 | 32,36 | 11,15 | 11,63 | 0,80 |
| ASP | 170 | 0,76 | 0,56 | 1,33 | 1,40 | 25,70 | 31,35 | 11,30 | 11,88 | 0,75 |
| ASN | 171 |      | 0,55 |      | 1,38 |       | 31,55 |       | 12,12 |      |
| SER | 172 | 0,77 | 0,53 | 1,39 | 1,42 | 22,70 | 32,89 | 10,80 | 11,71 | 0,76 |
| PRO | 173 |      |      |      |      |       |       |       |       |      |
| PHE | 174 | 0,87 | 0,48 | 1,37 | 1,41 | 18,50 | 35,84 | 11,90 | 11,82 |      |
| ASP | 175 | 0,73 | 0,52 | 1,48 | 1,41 |       | 33,33 | 10,90 | 11,82 | 0,76 |
| GLY | 176 | 0,77 | 0,48 | 1,43 | 1,39 | 25,80 | 35,97 | 12,65 | 11,98 | 0,91 |
| PRO | 177 |      |      |      |      |       |       |       |       |      |
| GLY | 178 | 0,93 | 0,57 |      | 1,44 | 20,90 | 30,58 |       | 11,52 | 0,66 |
| GLY | 179 | 0,88 | 0,42 | 1,44 | 1,40 | 23,45 | 40,82 | 11,75 | 11,95 | 0,80 |
| ASN | 180 | 0,73 | 0,50 | 1,43 | 1,41 | 20,90 | 34,36 | 10,40 | 11,81 | 0,68 |
| LEU | 181 |      | 0,51 | 1,31 | 1,39 |       | 33,67 | 10,80 | 12,00 | 0,71 |
| ALA | 182 | 0,88 | 0,52 | 1,37 | 1,42 | 22,10 | 33,33 | 9,70  | 11,74 | 0,79 |
| HIS | 183 | 0,81 | 0,53 | 1,33 | 1,42 | 22,45 | 32,79 | 10,50 | 11,70 | 0,82 |
| ALA | 184 | 0,83 | 0,51 | 1,17 | 1,41 |       | 34,01 | 8,90  | 11,78 | 0,76 |
| PHE | 185 | 0,76 | 0,55 | 1,11 | 1,43 |       | 31,75 | 9,30  | 11,66 | 0,75 |
| GLN | 186 | 0,84 | 0,57 | 1,50 | 1,44 | 24,40 | 30,67 | 10,30 | 11,55 | 0,58 |
| PRO | 187 |      |      |      |      |       |       |       |       |      |
| GLY | 188 | 0,88 | 0,58 | 1,37 | 1,43 | 19,30 | 30,40 | 10,25 | 11,61 | 1,06 |
| PRO | 189 |      |      |      |      |       |       |       |       |      |
| GLY | 190 | 0,69 | 0,52 | 1,17 | 1,41 | 21,60 | 33,33 | 9,50  | 11,78 | 1,05 |
| ILE | 191 |      | 0,49 | 1,65 | 1,42 |       | 35,09 | 12,05 | 11,71 |      |
| GLY | 192 | 0,89 | 0,44 | 1,45 | 1,39 | 24,40 | 38,76 | 11,45 | 12,02 | 0,98 |
| GLY | 193 | 0,82 | 0,56 | 1,43 | 1,44 | 26,45 | 31,45 | 11,00 | 11,59 | 0,97 |
| ASP | 194 | 0,84 | 0,51 | 1,50 | 1,42 | 23,25 | 34,13 | 11,70 | 11,76 | 0,75 |
| ALA | 195 |      | 0,55 | 1,30 | 1,43 |       | 31,85 | 12,70 | 11,61 | 0,89 |
| HIS | 196 | 0,87 | 0,54 | 1,31 | 1,42 | 22,85 | 32,05 | 11,00 | 11,75 | 0,87 |
| PHE | 197 | 0,87 | 0,49 | 1,34 | 1,42 | 24,85 | 35,09 | 10,90 | 11,75 | 0,95 |
| ASP | 198 | 0,77 | 0,47 | 1,39 | 1,40 | 21,60 | 36,36 | 11,25 | 11,93 | 0,87 |
| GLU | 199 | 0,69 | 0,47 | 1,44 | 1,42 | 20,65 | 36,63 | 12,00 | 11,78 | 0,94 |
| ASP | 200 | 0,88 | 0,55 | 1,48 | 1,40 | 25,90 | 31,45 | 12,00 | 11,90 | 0,80 |
| GLU | 201 | 0,84 | 0,47 | 1,49 | 1,38 | 26,10 | 36,50 | 11,55 | 12,06 | 0,86 |
| ARG | 202 | 0,84 | 0,50 | 1,43 | 1,41 | 18,00 | 34,84 | 11,45 | 11,78 | 0,90 |
| TRP | 203 | 0,82 | 0,43 | 1,34 | 1,40 | 23,00 | 40,00 | 11,00 | 11,89 | 0,81 |
| THR | 204 | 0,86 | 0,57 | 1,35 | 1,39 | 20,75 | 30,77 | 10,25 | 12,00 | 0,83 |
| ASN | 205 | 0,65 | 0,56 | 1,43 | 1,37 | 24,20 | 31,35 | 11,45 | 12,22 | 0,79 |
| ASN | 206 |      | 0,53 | 1,43 | 1,42 | 30,50 | 32,57 | 11,10 | 11,70 | 0,78 |
| PHE | 207 | 0,85 | 0,55 | 1,27 | 1,40 |       | 31,95 | 11,50 | 11,89 |      |
| ARG | 208 | 0,83 | 0,58 | 1,53 | 1,43 | 22,45 | 30,40 | 10,80 | 11,61 |      |
| GLU | 209 | 0,92 | 0,43 | 1,47 | 1,40 | 21,45 | 39,53 | 10,65 | 11,89 | 0,65 |
| TYR | 210 | 0,75 | 0,45 | 1,42 | 1,40 | 22,55 | 37,88 | 10,60 | 11,93 | 0,71 |
| ASN | 211 |      | 0,48 | 1,43 | 1,41 | 23,60 | 36,23 | 11,60 | 11,85 | 0,79 |
| LEU | 212 | 0,75 | 0,58 | 1,40 | 1,38 | 18,60 | 30,40 | 10,80 | 12,08 | 0,70 |
| HIS | 213 | 0,76 | 0,55 | 1,36 | 1,39 | 26,10 | 31,95 | 13,20 | 12,03 | 0,77 |
| ARG | 214 | 0,81 | 0,56 | 1,43 | 1,37 | 25,15 | 31,25 | 11,75 | 12,17 | 0,85 |
| VAL | 215 | 0,79 | 0,58 | 1,35 | 1,38 | 26,40 | 30,49 | 12,80 | 12,11 | 0,74 |
| ALA | 216 | 0,83 | 0,56 | 1,40 | 1,40 | 24,30 | 31,35 | 11,70 | 11,95 | 0,87 |
| ALA | 217 | 0,81 | 0,52 | 1,21 | 1,38 | 22,25 | 33,00 | 9,35  | 12,14 |      |
| HIS | 218 | 0,77 | 0,57 | 1,29 | 1,37 | 24,65 | 30,86 | 11,50 | 12,21 | 0,67 |
| ALA | 219 | 0,92 | 0,56 | 1,35 | 1,38 | 25,00 | 30,96 | 11,60 | 12,05 | 0,82 |
| LEU | 220 | 0,81 | 0,53 | 1,43 | 1,39 | 21,80 | 32,89 | 10,35 | 11,99 | 0,85 |
| GLY | 221 | 0,71 | 0,53 | 1,38 | 1,37 | 23,30 | 32,47 | 11,40 | 12,20 | 0,88 |
| HIS | 222 | 0,81 | 0,55 | 1,40 | 1,37 | 24,15 | 31,75 | 11,30 | 12,21 | 0,78 |
| SER | 223 |      | 0,51 | 1,41 | 1,39 | 31,40 | 34,13 | 11,45 | 12,02 | 0,86 |
| LEU | 224 | 0,64 | 0,46 | 1,39 | 1,39 | 22,15 | 37,45 | 10,75 | 12,02 | 0,84 |
| GLY | 225 | 0,86 | 0,58 | 1,45 | 1,37 | 21,10 | 30,49 | 11,30 | 12,21 | 0,55 |
| LEU | 226 | 0,61 | 0,57 |      | 1,41 |       | 30,67 | 13,15 | 11,79 | 0,77 |
| SER | 227 | 0,69 | 0,54 | 1,49 | 1,38 | 23,90 | 32,36 | 9,45  | 12,09 | 0,74 |
| HIS | 228 |      | 0,52 |      | 1,43 |       | 33,44 |       | 11,66 | 0,84 |
| SER | 229 | 0,71 | 0,58 | 1,36 | 1,40 | 18,10 | 30,40 | 10,30 | 11,92 | 0,71 |
| THR | 230 | 0,82 | 0,58 | 1,45 | 1,37 | 24,30 | 30,40 | 10,80 | 12,21 | 0,73 |
| ASP | 231 | 0,85 | 0,44 | 1,41 | 1,40 | 23,50 | 38,76 | 10,70 | 11,89 | 0,72 |
| ILE | 232 | 0,82 | 0,51 |      | 1,41 | 25,55 | 33,78 |       | 11,79 | 0,72 |
| GLY | 233 | 0,96 | 0,57 | 1,46 | 1,38 | 24,90 | 30,58 | 12,30 | 12,08 | 0,76 |
| ALA | 234 | 0,98 | 0,57 | 1,44 | 1,44 |       | 30,58 | 10,70 | 11,53 | 0,82 |



|     |     |      |      |      |      |       |       |       |       |      |
|-----|-----|------|------|------|------|-------|-------|-------|-------|------|
| LEU | 235 |      | 0,58 |      | 1,39 |       | 30,40 |       | 11,95 | 0,68 |
| MET | 236 |      | 0,55 | 1,32 | 1,38 |       | 31,75 | 10,25 | 12,05 |      |
| TYR | 237 | 0,86 | 0,53 | 1,54 | 1,43 | 25,30 | 32,89 | 10,80 | 11,63 | 0,91 |
| PRO | 238 |      |      |      |      |       |       |       |       |      |
| SER | 239 | 0,60 | 0,55 | 1,21 | 1,42 | 21,00 | 31,75 | 9,50  | 11,71 | 0,61 |
| TYR | 240 | 0,53 | 0,51 |      | 1,41 |       | 33,78 |       | 11,78 | 0,84 |
| THR | 241 | 0,93 | 0,53 | 1,53 | 1,38 | 24,70 | 32,68 | 13,30 | 12,11 | 0,59 |
| PHE | 242 |      | 0,49 |      | 1,39 |       | 35,21 |       | 11,96 |      |
| SER | 243 |      | 0,51 |      | 1,38 |       | 34,25 |       | 12,14 |      |
| GLY | 244 |      | 0,56 |      | 1,42 |       | 31,06 | 7,55  | 11,74 | 0,88 |
| ASP | 245 | 1,32 | 0,58 | 1,32 | 1,44 | 12,80 | 30,40 | 8,50  | 11,51 | 0,40 |
| VAL | 246 | 0,97 | 0,54 | 1,31 | 1,40 | 16,30 | 32,05 | 10,00 | 11,90 | 0,39 |
| GLN | 247 | 0,89 | 0,57 | 1,25 | 1,44 |       | 30,86 | 9,90  | 11,59 | 0,73 |
| LEU | 248 | 0,65 | 0,57 | 1,35 | 1,44 | 23,85 | 30,58 | 9,95  | 11,56 | 1,04 |
| ALA | 249 | 0,68 | 0,51 | 1,39 | 1,42 | 22,50 | 34,13 | 10,20 | 11,75 | 0,49 |
| GLN | 250 |      | 0,43 | 1,65 | 1,39 |       | 39,37 | 11,00 | 12,00 | 0,49 |
| ASP | 251 | 0,89 | 0,49 | 1,53 | 1,38 | 22,90 | 35,21 | 11,50 | 12,12 | 0,84 |
| ASP | 252 | 0,73 | 0,48 | 1,41 | 1,39 | 20,90 | 35,59 | 10,15 | 12,02 | 0,72 |
| ILE | 253 |      | 0,43 | 1,33 | 1,39 |       | 39,53 | 11,20 | 11,99 | 0,60 |
| ASP | 254 | 0,79 | 0,46 | 1,37 | 1,39 | 24,90 | 37,59 | 11,20 | 12,05 | 0,63 |
| GLY | 255 | 0,75 | 0,50 | 1,41 | 1,38 | 20,30 | 34,36 | 10,30 | 12,14 | 0,91 |
| ILE | 256 | 0,84 | 0,47 | 1,52 | 1,39 | 26,50 | 36,50 | 12,05 | 12,02 | 0,91 |
| GLN | 257 | 0,88 | 0,44 | 1,37 | 1,39 | 26,20 | 38,91 | 10,95 | 12,00 | 0,88 |
| ALA | 258 |      | 0,53 | 1,38 | 1,37 |       | 32,89 | 10,80 | 12,14 | 0,63 |
| ILE | 259 | 0,78 | 0,53 | 1,27 | 1,38 | 24,10 | 32,79 | 9,50  | 12,05 | 0,72 |
| TYR | 260 | 0,81 | 0,44 | 1,21 | 1,39 | 20,00 | 38,76 | 8,65  | 12,02 | 0,81 |
| GLY | 261 | 0,79 | 0,55 | 1,17 | 1,43 |       | 31,65 | 6,10  | 11,64 | 0,85 |
| ARG | 262 | 0,81 | 0,58 |      |      | 19,45 | 30,40 |       |       | 0,67 |
| SER | 263 | 0,94 | 0,46 |      |      | 19,75 | 37,45 |       |       | 0,45 |
| GLN | 264 |      | 0,54 |      |      |       | 32,47 |       |       |      |
| ASN | 265 |      | 0,58 |      |      |       | 30,40 |       |       |      |
| PRO | 266 |      |      |      |      |       |       |       |       |      |
| VAL | 267 | 0,98 | 0,53 |      |      |       | 33,00 |       |       | 0,37 |
| GLN | 268 | 1,09 | 0,49 |      |      |       | 35,34 |       |       | 0,39 |
| PRO | 269 |      |      |      |      |       |       |       |       |      |
| ILE | 270 | 1,13 | 0,55 |      |      | 11,90 | 31,45 |       |       | 0,30 |
| GLY | 271 | 1,08 | 0,58 |      | 1,12 | 12,10 | 30,49 |       | 15,04 | 0,34 |
| PRO | 272 |      |      |      |      |       |       |       |       |      |
| GLN | 273 |      | 0,47 |      | 1,06 |       | 36,63 |       | 15,87 |      |
| THR | 274 |      | 0,47 |      | 1,06 |       | 36,76 |       | 15,90 |      |
| PRO | 275 |      |      |      |      |       |       |       |       |      |
| LYS | 276 |      | 0,54 | 1,21 | 1,10 |       | 32,05 | 16,83 | 15,24 |      |
| ALA | 277 | 0,74 | 0,49 | 1,21 | 1,08 | 28,80 | 35,34 | 17,80 | 15,65 | 0,95 |
| CYS | 278 | 0,72 | 0,42 | 1,06 | 1,08 | 27,00 | 40,65 | 19,90 | 15,70 | 0,91 |
| ASP | 279 | 0,68 | 0,57 | 1,15 | 1,10 | 22,55 | 30,58 | 17,00 | 15,38 | 0,57 |
| SER | 280 |      | 0,54 |      | 1,07 |       | 32,26 |       | 15,72 |      |
| LYS | 281 |      | 0,45 |      | 1,06 |       | 37,88 |       | 15,87 |      |
| LEU | 282 | 0,72 | 0,58 | 1,09 | 1,08 | 23,00 | 30,40 | 16,84 | 15,65 | 0,84 |
| THR | 283 | 0,75 | 0,43 | 1,07 | 1,08 | 33,20 | 39,84 | 16,04 | 15,60 | 0,90 |
| PHE | 284 | 0,63 | 0,44 | 1,11 | 1,08 | 20,35 | 38,61 | 17,49 | 15,70 | 0,57 |
| ASP | 285 |      | 0,49 | 1,03 | 1,07 |       | 35,34 | 18,60 | 15,75 |      |
| ALA | 286 | 0,77 | 0,51 | 1,03 | 1,05 | 35,00 | 34,01 | 20,20 | 16,05 | 0,78 |
| ILE | 287 | 0,58 | 0,49 | 0,96 | 1,05 | 28,20 | 35,46 | 18,59 | 16,05 | 0,99 |
| THR | 288 |      | 0,47 | 1,05 | 1,05 |       | 36,50 | 20,62 | 16,05 | 0,86 |
| THR | 289 | 0,72 | 0,49 | 0,99 | 1,05 | 26,50 | 35,09 | 21,05 | 16,05 | 0,81 |
| ILE | 290 | 0,73 | 0,58 | 0,99 | 1,07 | 31,70 | 30,40 | 18,78 | 15,77 | 0,70 |
| ARG | 291 | 0,67 | 0,53 | 1,06 | 1,05 | 24,20 | 32,68 | 18,10 | 16,03 | 0,58 |
| GLY | 292 | 0,80 | 0,52 | 1,13 | 1,06 | 23,70 | 33,44 | 18,44 | 15,92 | 0,73 |
| GLU | 293 |      | 0,57 | 1,07 | 1,08 |       | 30,67 | 18,52 | 15,58 | 0,64 |
| VAL | 294 | 0,81 | 0,54 | 1,05 | 1,05 | 26,80 | 32,05 | 16,93 | 16,00 | 0,57 |
| MET | 295 |      | 0,48 | 1,02 | 1,05 | 22,65 | 35,84 | 16,93 | 16,05 |      |
| PHE | 296 |      | 0,55 | 0,99 | 1,06 | 39,30 | 31,85 | 17,92 | 15,90 | 0,80 |
| PHE | 297 |      | 0,45 | 1,03 | 1,07 | 35,00 | 38,46 | 19,62 | 15,77 | 0,90 |
| LYS | 298 |      | 0,51 | 1,04 | 1,09 | 35,60 | 34,13 | 18,34 | 15,38 | 0,71 |
| ASP | 299 | 0,55 | 0,46 | 1,05 | 1,06 | 26,00 | 37,04 | 17,38 | 15,92 | 0,40 |
| ARG | 300 | 0,54 | 0,54 | 1,06 | 1,09 | 20,20 | 32,36 | 19,50 | 15,41 | 0,65 |
| PHE | 301 |      | 0,56 | 1,19 | 1,12 |       | 30,96 | 18,33 | 15,06 |      |
| TYR | 302 | 0,59 | 0,47 | 1,07 | 1,06 | 31,25 | 36,36 | 18,63 | 15,95 | 0,87 |
| MET | 303 |      | 0,47 | 0,98 | 1,05 |       | 36,36 | 21,07 | 16,00 | 0,72 |
| ARG | 304 | 0,72 | 0,44 | 1,00 | 1,06 |       | 39,06 | 20,56 | 15,95 | 0,95 |
| THR | 305 | 0,67 | 0,52 | 1,11 | 1,05 | 30,15 | 33,44 | 19,11 | 16,05 | 0,99 |
| ASN | 306 | 0,90 | 0,47 | 1,16 | 1,05 | 22,50 | 36,36 | 16,18 | 16,05 | 0,59 |
| PRO | 307 |      |      |      |      |       |       |       |       |      |
| PHE | 308 | 0,99 | 0,57 | 1,27 | 1,09 | 18,15 | 30,58 | 14,13 | 15,55 | 0,60 |

|     |     |      |      |      |      |       |       |       |       |      |
|-----|-----|------|------|------|------|-------|-------|-------|-------|------|
| TYR | 309 | 0,85 | 0,58 | 1,19 | 1,08 | 21,65 | 30,49 | 14,15 | 15,63 | 0,67 |
| PRO | 310 |      |      |      |      |       |       |       |       |      |
| GLU | 311 | 0,93 | 0,54 | 1,29 | 1,05 |       | 32,26 | 11,16 | 16,00 | 0,34 |
| VAL | 312 | 0,96 | 0,56 | 1,29 | 1,07 | 16,60 | 31,35 | 15,32 | 15,72 | 0,63 |
| GLU | 313 | 0,58 | 0,45 | 1,09 | 1,05 | 17,70 | 37,88 | 15,32 | 16,00 | 0,50 |
| LEU | 314 | 0,67 | 0,50 | 1,03 | 1,06 | 27,35 | 34,36 | 17,72 | 15,97 | 0,96 |
| ASN | 315 | 0,68 | 0,46 | 1,03 | 1,06 |       | 37,17 | 16,72 | 15,85 |      |
| PHE | 316 | 0,56 | 0,46 | 1,00 | 1,07 | 29,75 | 37,31 | 17,45 | 15,82 |      |
| ILE | 317 |      | 0,58 | 0,89 | 1,13 |       | 30,40 | 19,31 | 14,90 | 0,65 |
| SER | 318 | 0,66 | 0,56 | 1,16 | 1,12 | 27,30 | 31,35 | 18,16 | 15,08 | 0,80 |
| VAL | 319 | 0,68 | 0,56 | 1,10 | 1,11 | 27,55 | 31,25 | 19,18 | 15,24 | 0,97 |
| PHE | 320 | 0,68 | 0,57 | 1,04 | 1,12 |       | 30,77 | 16,85 | 15,02 |      |
| TRP | 321 | 0,75 | 0,58 | 0,96 | 1,10 | 25,90 | 30,49 | 17,03 | 15,27 | 1,03 |
| PRO | 322 |      |      |      |      |       |       |       |       |      |
| GLN | 323 | 0,91 | 0,54 | 1,07 | 1,12 | 18,80 | 32,05 | 17,30 | 14,97 | 0,76 |
| LEU | 324 | 0,63 | 0,58 | 1,05 | 1,11 | 32,20 | 30,49 | 19,29 | 15,11 | 0,74 |
| PRO | 325 |      |      |      |      |       |       |       |       |      |
| ASN | 326 | 0,70 | 0,44 | 1,02 | 1,09 | 23,40 | 38,76 | 15,52 | 15,55 | 0,79 |
| GLY | 327 | 0,91 | 0,58 | 1,16 | 1,10 | 20,70 | 30,40 | 16,72 | 15,29 | 0,78 |
| LEU | 328 | 0,77 | 0,54 | 1,02 | 1,06 | 22,40 | 32,36 | 16,74 | 15,92 | 0,79 |
| GLU | 329 | 0,75 | 0,58 |      | 1,10 |       | 30,49 |       | 15,38 | 0,97 |
| ALA | 330 |      | 0,51 | 1,02 | 1,09 |       | 33,90 | 18,04 | 15,46 | 0,81 |
| ALA | 331 | 0,60 | 0,48 | 1,03 | 1,09 | 23,60 | 35,84 | 17,18 | 15,50 | 0,95 |
| TYR | 332 | 0,73 | 0,54 | 1,06 | 1,09 | 23,00 | 32,36 | 20,08 | 15,48 | 0,65 |
| GLU | 333 | 0,72 | 0,54 | 1,02 | 1,09 | 21,50 | 32,36 | 18,04 | 15,48 | 0,51 |
| PHE | 334 | 0,53 | 0,44 | 1,02 | 1,08 |       | 38,91 | 17,00 | 15,67 | 0,97 |
| ALA | 335 | 0,79 | 0,57 | 1,19 | 1,10 | 24,70 | 30,86 | 19,17 | 15,31 | 0,59 |
| ASP | 336 | 0,76 | 0,57 | 1,20 | 1,12 | 32,60 | 30,58 | 20,48 | 14,99 |      |
| ARG | 337 | 0,71 | 0,58 | 1,02 | 1,12 | 23,65 | 30,40 | 15,96 | 14,99 |      |
| ASP | 338 |      | 0,45 | 1,06 | 1,08 | 24,20 | 37,74 | 18,28 | 15,58 | 0,61 |
| GLU | 339 | 0,69 | 0,42 | 1,04 | 1,06 | 30,60 | 40,32 | 18,12 | 15,85 | 0,75 |
| VAL | 340 | 0,76 | 0,50 | 1,08 | 1,09 | 31,40 | 34,72 | 17,28 | 15,48 | 0,65 |
| ARG | 341 | 0,71 | 0,47 | 1,05 | 1,09 | 23,75 | 36,63 | 16,12 | 15,50 | 0,81 |
| PHE | 342 | 0,73 | 0,55 | 1,04 | 1,09 | 31,25 | 31,65 | 18,44 | 15,41 | 0,68 |
| PHE | 343 |      | 0,58 | 0,95 | 1,08 |       | 30,49 | 20,43 | 15,65 | 0,66 |
| LYS | 344 | 0,61 | 0,56 | 0,99 | 1,07 | 28,80 | 31,06 | 18,02 | 15,75 | 0,86 |
| GLY | 345 | 0,75 | 0,58 | 1,18 | 1,08 |       | 30,49 | 16,52 | 15,58 |      |
| ASN | 346 |      | 0,47 | 1,06 | 1,09 | 38,90 | 36,76 | 18,21 | 15,53 | 0,83 |
| LYS | 347 | 0,89 | 0,48 | 1,04 | 1,07 | 21,25 | 35,59 | 18,74 | 15,72 | 0,78 |
| TYR | 348 | 0,69 | 0,58 | 1,11 | 1,08 | 30,65 | 30,49 | 17,58 | 15,63 | 0,70 |
| TRP | 349 |      | 0,57 | 1,05 | 1,10 | 25,60 | 30,67 | 17,86 | 15,38 | 0,54 |
| ALA | 350 |      | 0,53 |      | 1,09 |       | 32,57 |       | 15,50 |      |
| VAL | 351 | 0,89 | 0,45 | 1,11 | 1,09 | 38,10 | 38,17 | 19,87 | 15,55 | 0,64 |
| GLN | 352 | 0,89 | 0,45 | 1,09 | 1,09 | 28,00 | 38,17 | 17,07 | 15,50 | 0,77 |
| GLY | 353 | 0,82 | 0,44 | 1,16 | 1,08 | 20,10 | 38,76 | 19,46 | 15,55 | 0,74 |
| GLN | 354 | 0,99 | 0,57 | 1,29 | 1,11 |       | 30,58 |       | 15,15 | 0,88 |
| ASN | 355 | 0,77 | 0,43 | 1,08 | 1,09 | 27,20 | 39,68 | 17,07 | 15,53 | 0,62 |
| VAL | 356 | 0,69 | 0,43 | 1,07 | 1,08 | 20,80 | 39,68 | 17,36 | 15,65 | 0,88 |
| LEU | 357 | 0,73 | 0,52 | 1,04 | 1,09 | 23,55 | 33,22 | 18,06 | 15,46 | 0,79 |
| HIS | 358 | 0,98 | 0,56 | 1,18 | 1,13 | 27,05 | 31,35 | 17,73 | 14,95 | 0,83 |
| GLY | 359 |      | 0,44 |      | 1,08 |       | 39,22 |       | 15,65 |      |
| TYR | 360 | 0,63 | 0,56 | 0,98 | 1,13 | 23,50 | 31,45 | 18,72 | 14,97 | 0,80 |
| PRO | 361 |      |      |      |      |       |       |       |       |      |
| LYS | 362 |      | 0,58 |      | 1,09 |       | 30,40 |       | 15,48 |      |
| ASP | 363 | 0,79 | 0,58 | 1,03 | 1,08 | 28,40 | 30,40 | 17,58 | 15,55 | 0,76 |
| ILE | 364 |      | 0,52 | 1,13 | 1,12 | 27,50 | 33,11 | 18,14 | 15,04 | 0,92 |
| TYR | 365 | 0,69 | 0,45 | 1,10 | 1,10 | 23,35 | 37,74 | 18,70 | 15,36 | 0,96 |
| SER | 366 |      | 0,43 | 1,16 | 1,08 |       | 39,37 | 16,00 | 15,60 |      |
| SER | 367 |      | 0,54 |      | 1,11 |       | 32,36 |       | 15,13 |      |
| PHE | 368 |      | 0,52 | 1,10 | 1,12 |       | 33,11 | 18,97 | 15,04 | 0,79 |
| GLY | 369 | 0,59 | 0,43 | 0,97 | 1,08 | 25,20 | 39,53 | 22,54 | 15,60 | 0,74 |
| PHE | 370 | 0,58 | 0,46 | 1,03 | 1,09 | 28,60 | 37,17 | 19,29 | 15,53 | 0,99 |
| PRO | 371 |      |      |      |      |       |       |       |       |      |
| ARG | 372 |      | 0,54 | 1,06 | 1,06 |       | 32,26 |       | 15,90 |      |
| THR | 373 | 0,72 | 0,45 | 1,20 | 1,09 | 30,70 | 38,02 | 19,50 | 15,43 | 0,48 |
| VAL | 374 | 0,59 | 0,51 | 1,10 | 1,09 | 20,75 | 33,67 | 18,43 | 15,41 | 0,90 |
| LYS | 375 |      | 0,55 |      | 1,11 |       | 31,55 |       | 15,22 |      |
| HIS | 376 | 0,68 | 0,53 | 1,06 | 1,10 | 23,00 | 32,89 | 18,23 | 15,29 | 0,89 |
| ILE | 377 |      | 0,42 | 0,99 | 1,06 |       | 40,16 |       | 15,90 |      |
| ASP | 378 |      | 0,43 | 1,02 | 1,06 |       | 39,68 | 19,12 | 15,92 | 0,75 |
| ALA | 379 |      | 0,52 | 1,06 | 1,05 | 33,05 | 33,56 | 22,42 | 16,05 | 0,78 |
| ALA | 380 |      | 0,50 | 0,96 | 1,05 | 24,70 | 34,72 | 21,58 | 16,03 | 0,85 |
| LEU | 381 |      | 0,50 | 0,95 | 1,06 | 26,90 | 34,48 | 20,86 | 15,95 | 0,98 |
| SER | 382 |      | 0,54 | 1,07 | 1,06 |       | 31,95 | 20,93 | 15,97 | 0,74 |
| GLU | 383 | 0,71 | 0,56 | 1,01 | 1,06 | 26,10 | 31,35 | 19,38 | 15,87 |      |
| GLU | 384 | 0,81 | 0,58 | 1,16 | 1,10 | 21,00 | 30,40 | 17,18 | 15,31 | 0,53 |

|     |     |      |      |      |      |       |       |       |       |      |
|-----|-----|------|------|------|------|-------|-------|-------|-------|------|
| ASN | 385 | 0,78 | 0,52 | 1,12 | 1,10 | 22,10 | 33,11 | 23,24 | 15,31 | 0,87 |
| THR | 386 | 0,80 | 0,44 | 1,04 | 1,09 | 22,30 | 39,22 | 15,89 | 15,48 | 0,67 |
| GLY | 387 | 0,74 | 0,51 | 1,09 | 1,05 | 25,85 | 34,01 | 19,04 | 16,05 | 0,50 |
| LYS | 388 | 0,71 | 0,55 | 1,11 | 1,09 | 26,55 | 31,75 | 18,07 | 15,46 | 0,74 |
| THR | 389 | 0,67 | 0,56 | 0,96 | 1,06 | 27,30 | 31,25 | 20,95 | 15,95 | 0,80 |
| TYR | 390 | 0,67 | 0,57 | 1,09 | 1,07 | 29,70 | 30,96 | 20,20 | 15,75 | 0,78 |
| PHE | 391 |      | 0,47 | 0,94 | 1,05 |       | 36,36 | 20,28 | 16,05 |      |
| PHE | 392 |      | 0,45 |      | 1,07 |       | 37,74 |       | 15,77 |      |
| VAL | 393 | 0,52 | 0,42 | 1,05 | 1,07 | 41,70 | 40,82 | 16,60 | 15,77 | 0,85 |
| ALA | 394 | 0,92 | 0,43 | 1,04 | 1,08 |       | 40,00 | 18,61 | 15,67 | 0,86 |
| ASN | 395 | 0,77 | 0,58 | 1,04 | 1,08 | 30,70 | 30,40 | 18,20 | 15,58 | 0,54 |
| LYS | 396 |      | 0,44 |      | 1,08 |       | 39,06 |       | 15,55 |      |
| TYR | 397 |      | 0,44 |      | 1,06 |       | 38,76 |       | 15,90 |      |
| TRP | 398 |      | 0,48 |      | 1,06 |       | 35,71 |       | 15,97 |      |
| ARG | 399 |      | 0,52 |      | 1,06 |       | 33,33 |       | 15,95 |      |
| TYR | 400 | 0,64 | 0,56 | 0,94 | 1,06 |       | 31,06 | 19,68 | 15,90 |      |
| ASP | 401 | 0,57 | 0,57 | 0,99 | 1,07 | 21,40 | 30,67 | 16,87 | 15,77 | 0,76 |
| GLU | 402 | 0,92 | 0,57 | 1,00 | 1,08 | 30,10 | 30,86 | 23,41 | 15,63 | 0,95 |
| TYR | 403 | 0,74 | 0,56 | 1,05 | 1,09 | 34,00 | 31,45 | 19,86 | 15,50 | 0,73 |
| LYS | 404 | 1,19 | 0,48 | 0,98 | 1,08 | 42,65 | 36,23 | 17,31 | 15,60 | 0,82 |
| ARG | 405 | 0,83 | 0,57 | 1,00 | 1,08 | 26,15 | 30,77 | 17,80 | 15,55 | 0,64 |
| SER | 406 | 0,68 | 0,57 | 1,04 | 1,09 | 29,45 | 30,77 | 18,44 | 15,48 | 0,88 |
| MET | 407 | 0,62 | 0,55 | 1,14 | 1,10 |       | 31,75 | 20,41 | 15,38 |      |
| ASP | 408 |      | 0,54 | 1,07 | 1,12 |       | 32,26 | 22,18 | 15,08 |      |
| PRO | 409 |      |      |      |      |       |       |       |       |      |
| GLY | 410 | 0,66 | 0,58 | 1,04 | 1,08 | 24,50 | 30,49 | 15,53 | 15,67 | 1,05 |
| TYR | 411 |      | 0,51 | 0,97 | 1,09 | 23,50 | 33,67 | 16,10 | 15,48 |      |
| PRO | 412 |      |      |      |      |       |       |       |       |      |
| LYS | 413 |      | 0,57 |      | 1,12 |       | 30,86 |       | 15,06 |      |
| MET | 414 |      | 0,42 | 1,01 | 1,08 |       | 40,82 | 15,94 | 15,67 |      |
| ILE | 415 |      | 0,53 | 1,06 | 1,12 |       | 32,79 | 18,16 | 15,04 |      |
| ALA | 416 | 0,72 | 0,52 | 1,02 | 1,11 | 24,10 | 33,56 | 18,62 | 15,22 | 0,87 |
| HIS | 417 |      | 0,53 | 1,02 | 1,09 |       | 32,79 | 17,06 | 15,50 | 0,68 |
| ASP | 418 |      | 0,48 | 1,04 | 1,09 |       | 35,71 | 17,15 | 15,41 | 0,68 |
| PHE | 419 |      | 0,57 |      | 1,12 |       | 30,67 |       | 15,02 |      |
| PRO | 420 |      |      |      |      |       |       |       |       |      |
| GLY | 421 |      | 0,58 |      | 1,11 |       | 30,40 |       | 15,22 |      |
| ILE | 422 |      | 0,50 | 1,18 | 1,08 |       | 34,36 | 19,45 | 15,67 | 0,80 |
| GLY | 423 | 0,69 | 0,42 | 1,10 | 1,08 | 22,90 | 40,49 | 17,31 | 15,63 | 0,63 |
| HIS | 424 |      | 0,50 | 1,02 | 1,09 |       | 34,72 | 18,91 | 15,50 |      |
| LYS | 425 | 0,72 | 0,57 | 1,13 | 1,09 | 25,00 | 30,96 | 19,00 | 15,50 | 0,77 |
| VAL | 426 | 0,74 | 0,58 | 0,99 | 1,07 | 22,60 | 30,49 | 18,67 | 15,82 |      |
| ASP | 427 |      | 0,55 | 1,10 | 1,09 |       | 31,85 | 18,70 | 15,53 | 0,68 |
| ALA | 428 |      | 0,50 | 1,03 | 1,09 |       | 34,60 | 21,71 | 15,46 | 0,58 |
| VAL | 429 | 0,77 | 0,52 | 1,08 | 1,09 | 32,80 | 33,44 | 19,69 | 15,41 | 0,79 |
| PHE | 430 | 0,72 | 0,55 | 1,05 | 1,09 |       | 31,65 | 22,71 | 15,46 | 0,58 |
| MET | 431 | 0,73 | 0,54 | 1,11 | 1,10 | 25,45 | 32,36 | 20,33 | 15,36 | 0,69 |
| LYS | 432 | 0,67 | 0,49 | 1,05 | 1,09 | 29,00 | 35,21 | 18,63 | 15,46 |      |
| ASP | 433 |      | 0,52 |      | 1,10 |       | 33,56 |       | 15,34 |      |
| GLY | 434 | 0,74 | 0,50 | 1,12 | 1,09 | 26,00 | 34,60 | 14,49 | 15,48 | 0,66 |
| PHE | 435 | 0,82 | 0,49 | 1,08 | 1,07 | 33,05 | 35,09 | 18,18 | 15,75 | 0,82 |
| PHE | 436 |      | 0,46 | 1,02 | 1,08 | 33,55 | 37,45 | 19,29 | 15,58 | 0,81 |
| TYR | 437 |      | 0,55 | 1,00 | 1,10 | 25,00 | 31,55 | 17,33 | 15,36 | 0,61 |
| PHE | 438 | 0,62 | 0,49 | 1,05 | 1,09 | 25,45 | 35,21 | 17,55 | 15,48 | 0,94 |
| PHE | 439 | 0,70 | 0,58 | 0,98 | 1,07 | 24,40 | 30,40 | 18,52 | 15,72 |      |
| HIS | 440 | 0,68 | 0,58 | 0,96 | 1,07 | 26,75 | 30,40 | 18,14 | 15,77 | 0,83 |
| GLY | 441 | 0,69 | 0,57 | 1,06 | 1,08 | 26,70 | 30,96 | 19,36 | 15,58 | 0,76 |
| THR | 442 |      | 0,58 | 1,16 | 1,13 | 24,65 | 30,40 | 19,82 | 14,90 | 0,81 |
| ARG | 443 | 0,72 | 0,57 | 1,14 | 1,09 | 28,90 | 30,58 | 18,46 | 15,48 | 0,84 |
| GLN | 444 |      | 0,57 |      | 1,09 |       | 30,96 |       | 15,53 |      |
| TYR | 445 | 0,56 | 0,56 | 1,02 | 1,08 | 19,45 | 31,15 | 19,38 | 15,58 |      |
| LYS | 446 |      | 0,58 | 1,09 | 1,09 |       | 30,49 | 18,49 | 15,50 |      |
| PHE | 447 | 0,53 | 0,48 | 1,11 | 1,09 | 26,00 | 35,59 | 22,17 | 15,50 | 0,71 |
| ASP | 448 | 0,56 | 0,55 | 1,08 | 1,11 | 25,80 | 31,45 | 17,73 | 15,15 | 0,99 |
| PRO | 449 |      |      |      |      |       |       |       |       |      |
| LYS | 450 |      | 0,51 | 0,92 | 1,07 |       | 33,90 | 20,02 | 15,77 | 0,85 |
| THR | 451 | 0,58 | 0,48 | 0,96 | 1,06 | 26,60 | 36,10 | 16,10 | 15,92 | 0,80 |
| LYS | 452 |      | 0,57 | 1,05 | 1,12 |       | 30,67 | 18,58 | 15,08 | 0,79 |
| ARG | 453 | 0,71 | 0,57 | 1,02 | 1,12 | 21,25 | 30,58 | 15,81 | 14,97 | 0,56 |
| ILE | 454 | 0,75 | 0,51 | 1,04 | 1,10 | 23,50 | 33,67 | 15,62 | 15,34 | 0,71 |
| LEU | 455 |      | 0,54 | 1,04 | 1,09 |       | 32,36 | 16,25 | 15,43 |      |
| THR | 456 | 0,75 | 0,58 | 1,05 | 1,08 | 26,80 | 30,49 | 25,00 | 15,60 | 0,88 |
| LEU | 457 | 0,93 | 0,58 | 1,17 | 1,07 | 21,70 | 30,49 | 17,05 | 15,70 |      |
| GLN | 458 | 0,72 | 0,58 | 1,08 | 1,07 | 25,25 | 30,49 | 19,49 | 15,72 | 0,93 |
| LYS | 459 | 0,85 | 0,58 | 1,22 | 1,09 | 24,40 | 30,40 | 20,40 | 15,48 | 0,98 |
| ALA | 460 | 1,00 | 0,57 | 1,23 | 1,13 | 26,55 | 30,77 | 20,65 | 14,88 | 0,86 |

|     |     |      |      |      |      |       |       |       |       |       |
|-----|-----|------|------|------|------|-------|-------|-------|-------|-------|
| ASN | 461 | 0,92 | 0,58 | 1,18 | 1,12 |       | 30,40 | 18,70 | 15,08 | 0,73  |
| SER | 462 | 0,65 | 0,53 | 1,12 | 1,07 | 28,00 | 32,57 | 19,41 | 15,75 | 0,78  |
| TRP | 463 | 0,97 | 0,58 | 1,28 | 1,09 | 24,45 | 30,49 | 18,51 | 15,48 | 0,76  |
| PHE | 464 | 0,75 | 0,58 | 1,11 | 1,11 | 25,30 | 30,40 | 18,13 | 15,11 | 0,70  |
| ASN | 465 | 0,88 | 0,54 | 1,12 | 1,10 | 25,50 | 32,26 | 21,92 | 15,31 | 1,05  |
| CYS | 466 |      | 0,42 | 1,19 | 1,07 |       | 40,65 | 17,26 | 15,72 | 0,61  |
| ARG | 467 |      |      |      |      |       |       |       |       |       |
| LYS | 468 | 0,98 |      |      |      |       |       |       |       | 0,75  |
| ASN | 469 | 1,11 |      | 1,19 |      |       |       | 5,72  |       | -0,69 |

**Table S5.** List of residues with a relaxation rate difference ( $R_{1\text{para}} - R_{1\text{dia}}$ ), for the backbone NH protons, higher than  $0.7 \text{ s}^{-1}$ , in presence of Gd(DTPA-MA) 1.4 mM (pH 7.2, 306K).

| Residue | Number | Residue | Number |
|---------|--------|---------|--------|
| THR     | 112    | ASN     | 355    |
| HIS     | 113    | LEU     | 357    |
| ASP     | 124    | ASP     | 363    |
| LEU     | 125    | SER     | 366    |
| ALA     | 128    | GLY     | 369    |
| GLU     | 135    | THR     | 373    |
| PHE     | 138    | VAL     | 374    |
| LYS     | 151    | HIS     | 376    |
| GLU     | 154    | ILE     | 377    |
| GLY     | 155    | GLU     | 383    |
| ALA     | 157    | ASN     | 385    |
| ASP     | 158    | THR     | 386    |
| GLY     | 166    | GLY     | 387    |
| HIS     | 168    | LYS     | 388    |
| ARG     | 169    | THR     | 389    |
| ASP     | 170    | TYR     | 390    |
| SER     | 172    | TYR     | 403    |
| PHE     | 174    | LYS     | 404    |
| GLY     | 176    | ARG     | 405    |
| ASN     | 180    | SER     | 406    |
| GLY     | 192    | GLY     | 410    |
| HIS     | 200    | TYR     | 411    |
| ARG     | 202    | ILE     | 415    |
| ASN     | 205    | ALA     | 416    |
| ASN     | 206    | GLY     | 423    |
| ARG     | 208    | LYS     | 425    |
| GLU     | 209    | GLY     | 434    |
| HIS     | 213    | GLY     | 441    |
| SER     | 227    | THR     | 442    |
| SER     | 229    | ARG     | 443    |
| THR     | 230    | GLN     | 444    |
| ASP     | 231    | LYS     | 446    |
| GLY     | 233    | THR     | 451    |
| THR     | 241    | LEU     | 455    |
| ASP     | 245    | LEU     | 457    |
| VAL     | 246    | GLN     | 458    |
| GLN     | 247    | SER     | 462    |
| ASP     | 251    | ASN     | 469    |
| ILE     | 253    |         |        |
| ALA     | 258    |         |        |
| GLN     | 268    |         |        |
| ILE     | 270    |         |        |
| GLY     | 271    |         |        |
| LYS     | 276    |         |        |
| ALA     | 277    |         |        |
| ASP     | 279    |         |        |
| LEU     | 282    |         |        |
| GLY     | 292    |         |        |
| VAL     | 294    |         |        |
| ASP     | 299    |         |        |
| ASN     | 306    |         |        |
| PHE     | 308    |         |        |
| TYR     | 309    |         |        |
| GLU     | 311    |         |        |
| VAL     | 312    |         |        |
| GLU     | 313    |         |        |
| LEU     | 314    |         |        |
| ARG     | 337    |         |        |
| ASP     | 338    |         |        |

|     |     |
|-----|-----|
| GLY | 345 |
| GLY | 353 |
| GLN | 354 |
